# Supplementary material
Source: PubMed Central journal article supplement (PMC4566934)
Supplement: NIHMS720856-supplement-Appendix_A__Supplementary_Data.pdf [file NIHMS720856-supplement-Appendix_A__Supplementary_Data.pdf]

# Supplementary Material

Design, synthesis, and biological evaluation of novel FAK scaffold inhibitors targeting the FAK-VEGFR3 protein-protein interaction.

Priyanka N. Gogate <sup>a, ‡</sup>, Manivannan Ethirajan <sup>a, ‡</sup>, Elena V. Kurenova <sup>b, d, \*</sup>, Andrew T. Magis <sup>c</sup>, Ravindra K. Pandey <sup>a, \*</sup>, and William G. Cance <sup>b, d, \*</sup>

<sup>a</sup>Department of Cell Stress Biology/ PDT Center Roswell Park Cancer Institute, Buffalo, NY 14263, U.S.A

<sup>b</sup>Department of Surgical Oncology, Roswell Park Cancer Institute, Buffalo, NY 14263, U.S.A

<sup>c</sup>Center for Biophysics and Computational Biology, University of Illinois at Urbana-Champaign, Urbana, IL 61801, U.S.A

<sup>d</sup>CureFAKtor Pharmaceuticals, Orchard Park, NY 14127, U.S.A

\*corresponding authors

## Contents

Fig. S1-S20: Copies of <sup>1</sup>H and <sup>13</sup>C NMR spectra of compounds

Table S1: Table containing Log P of all compounds

Fig. S21: Molecular docking of analog **27**

Fig. S22: Molecular docking of analog **28**

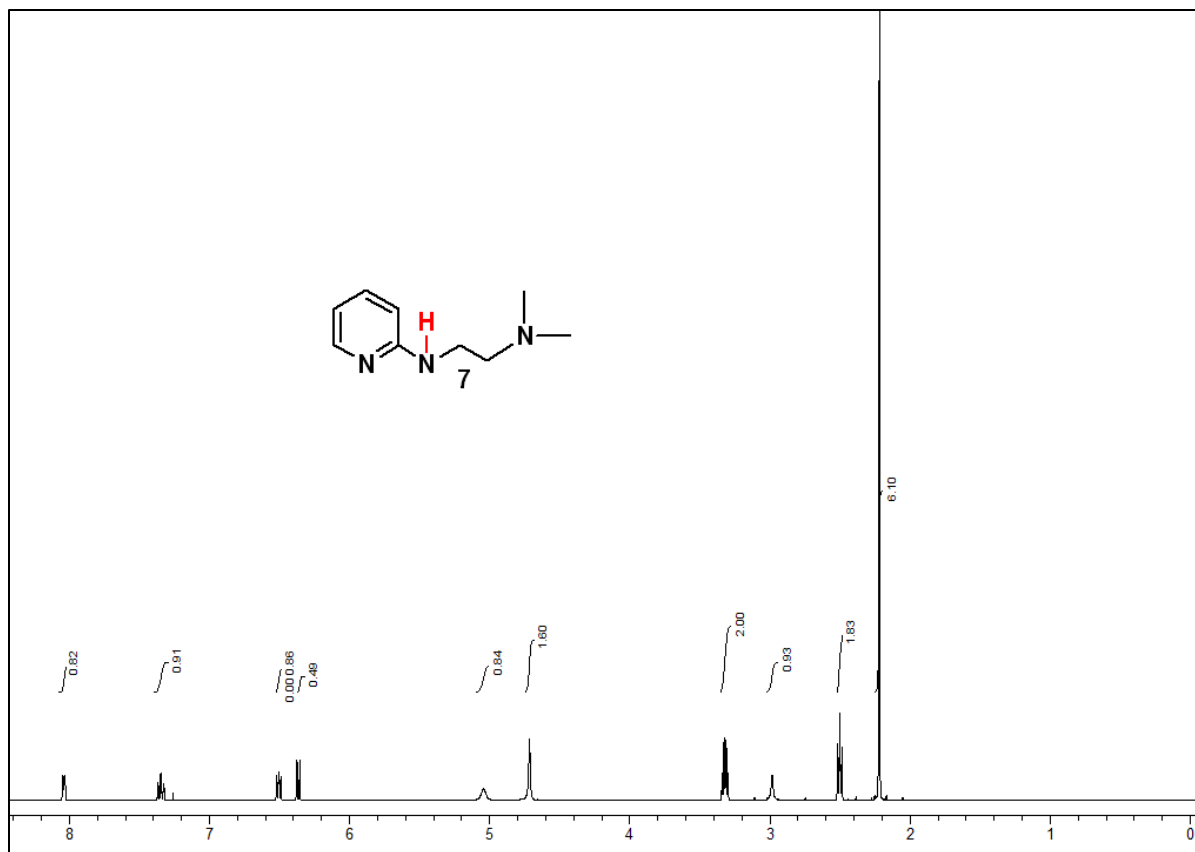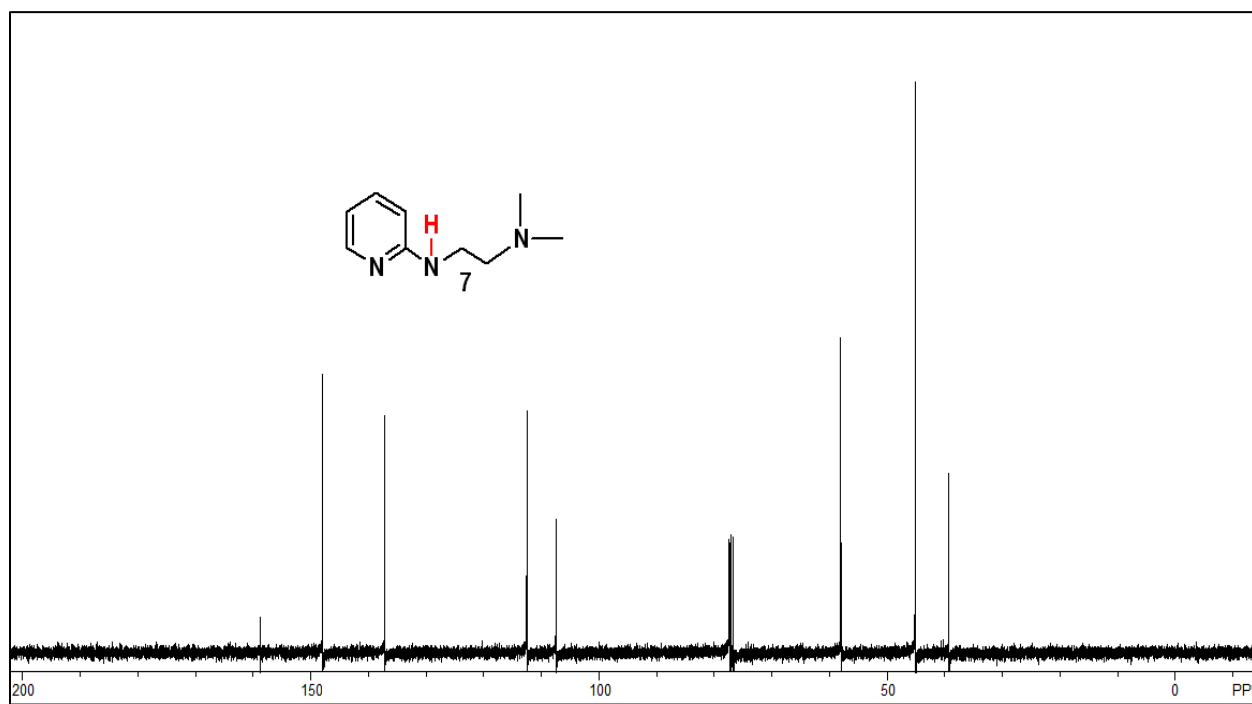

Figure S1

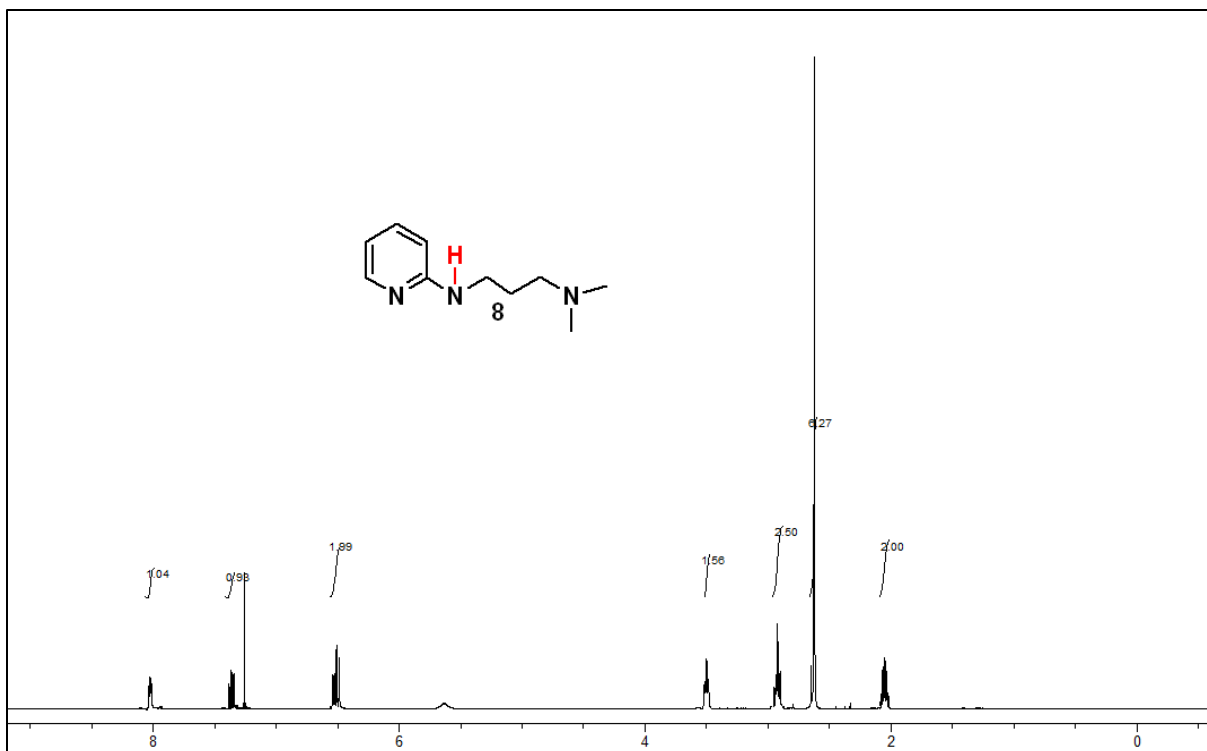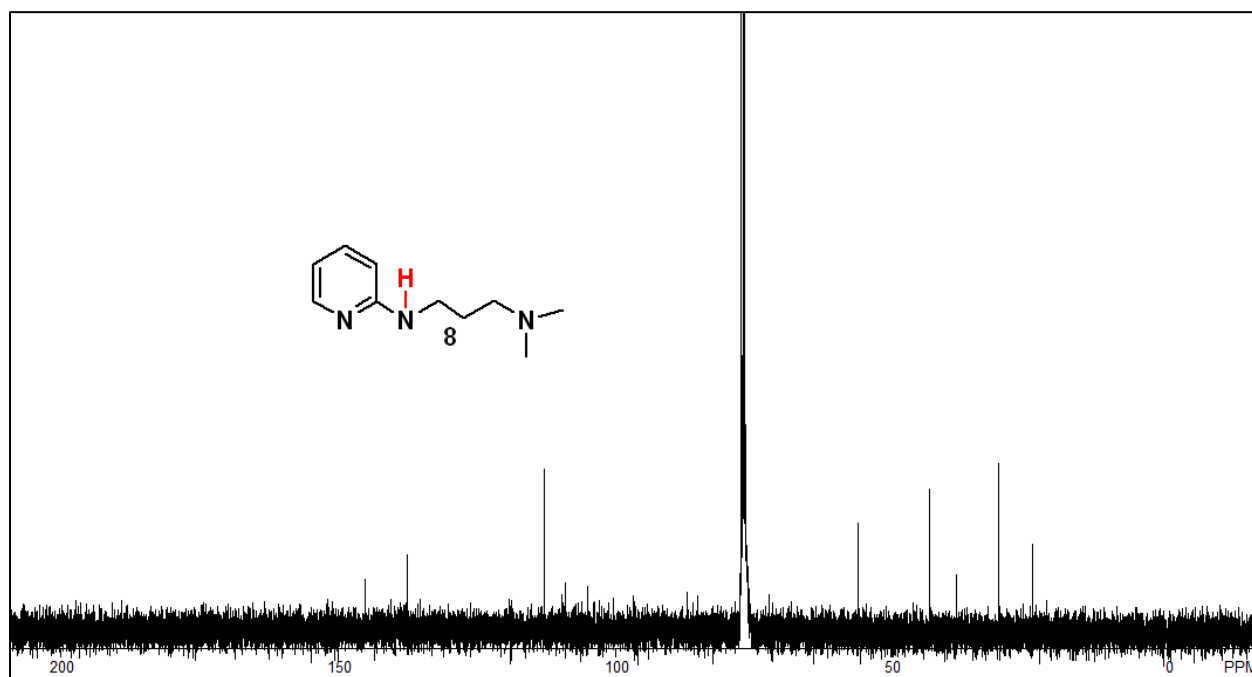

Figure S2

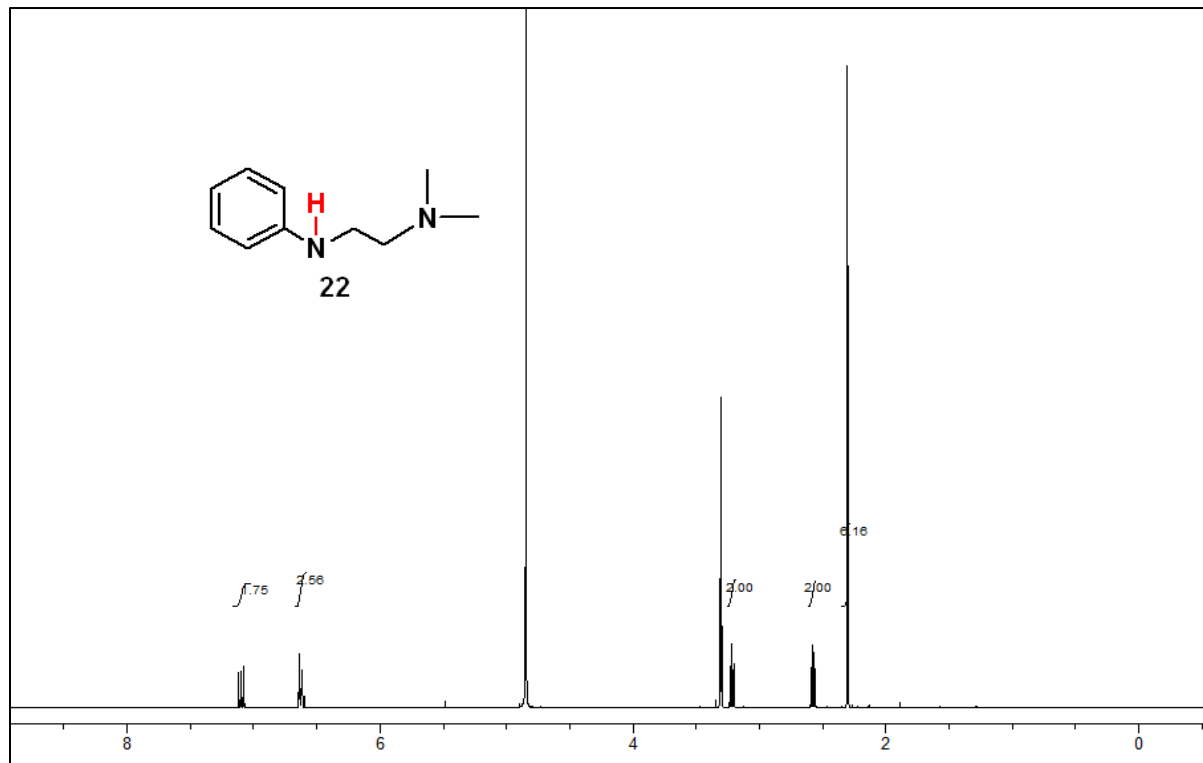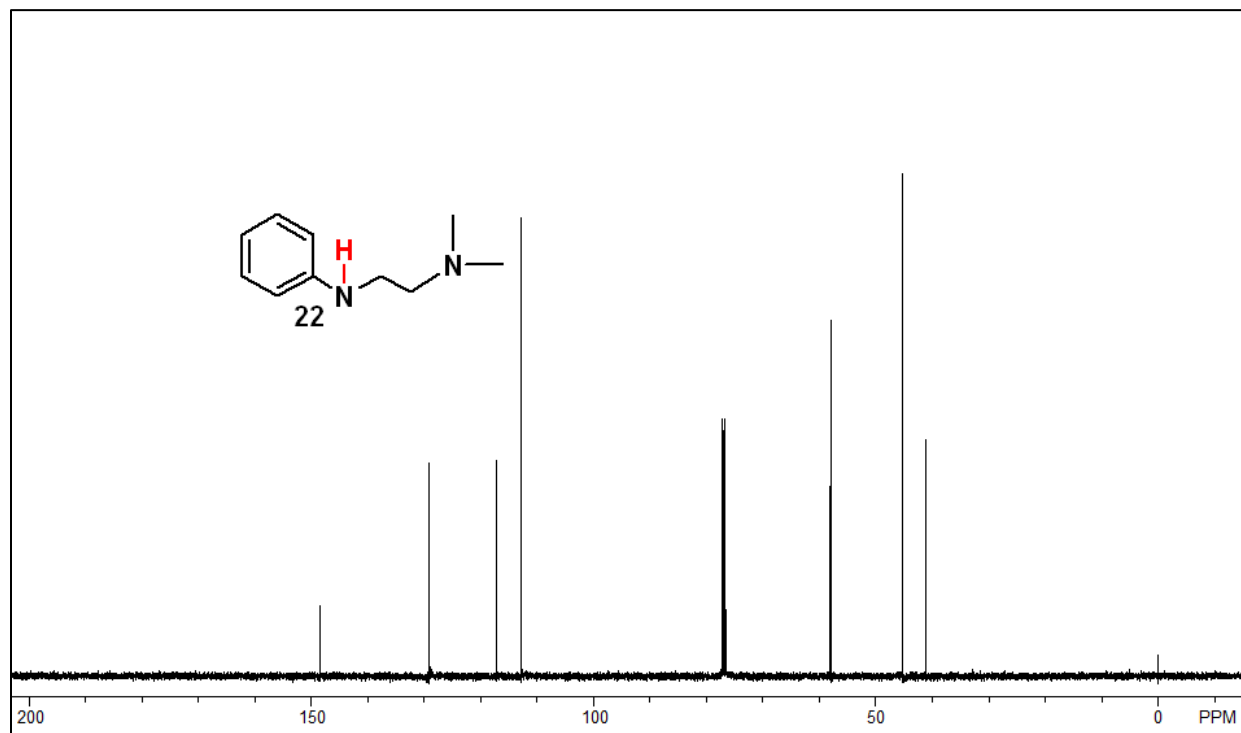

Figure S3

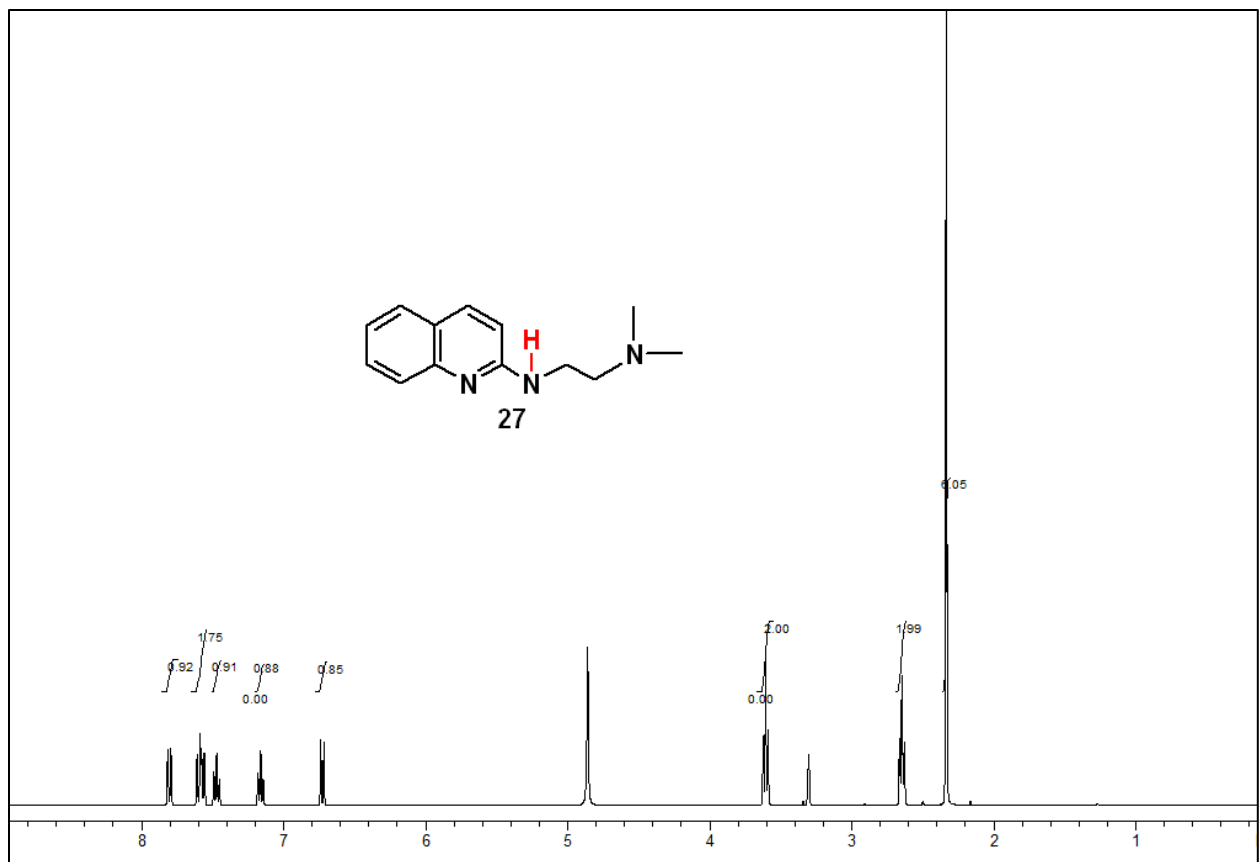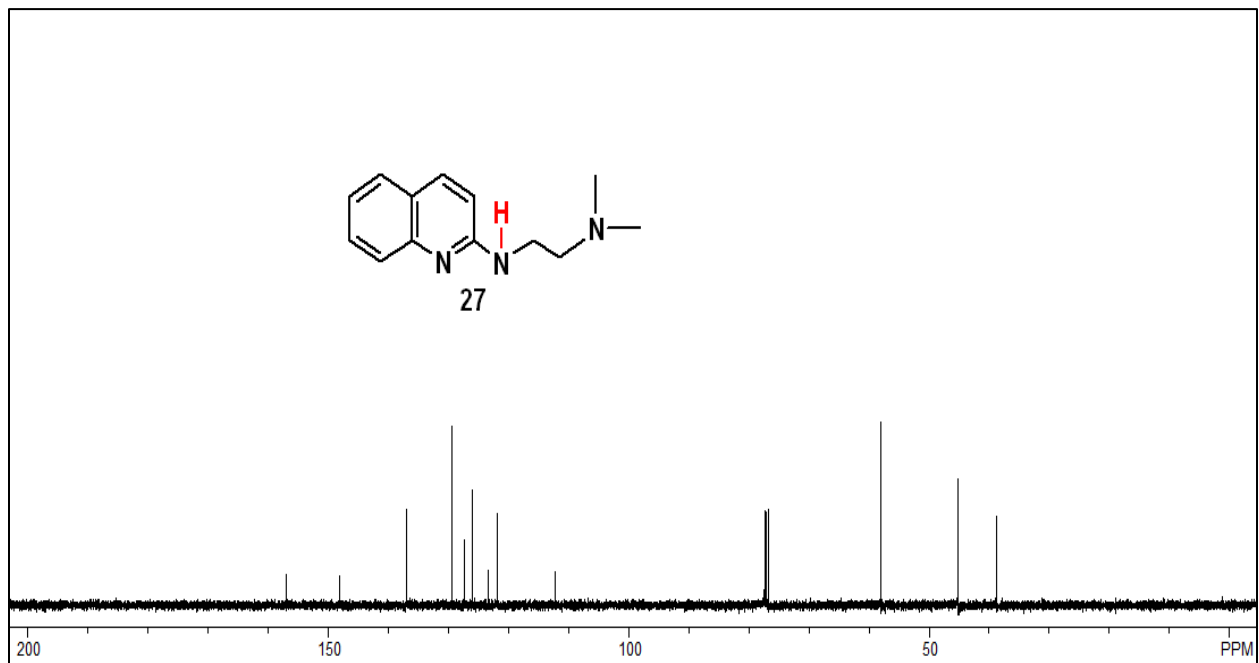

Figure S4

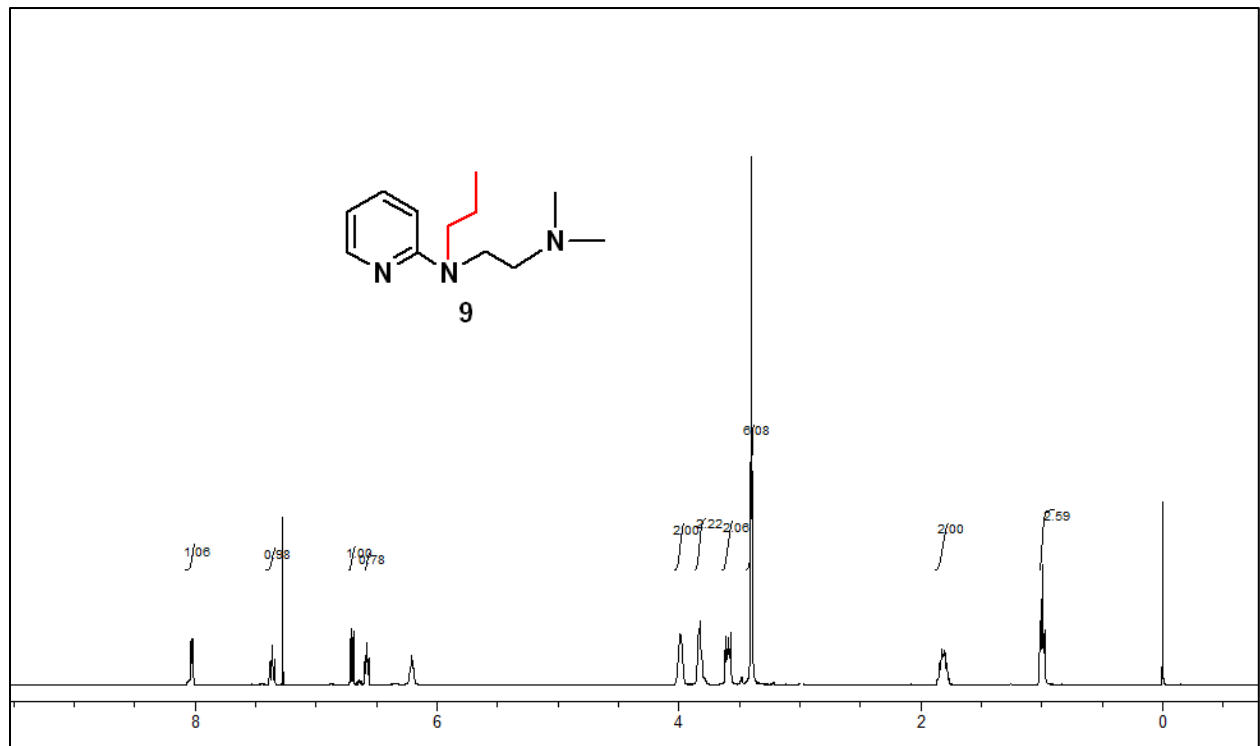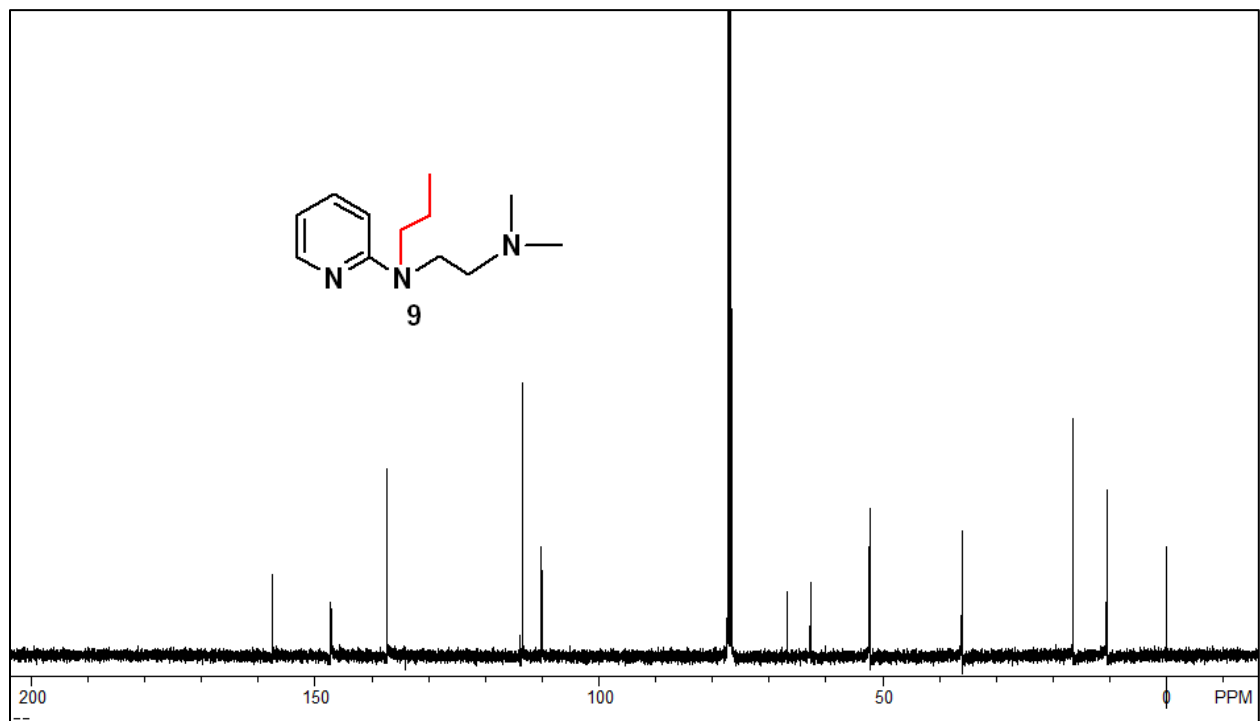

Figure S5

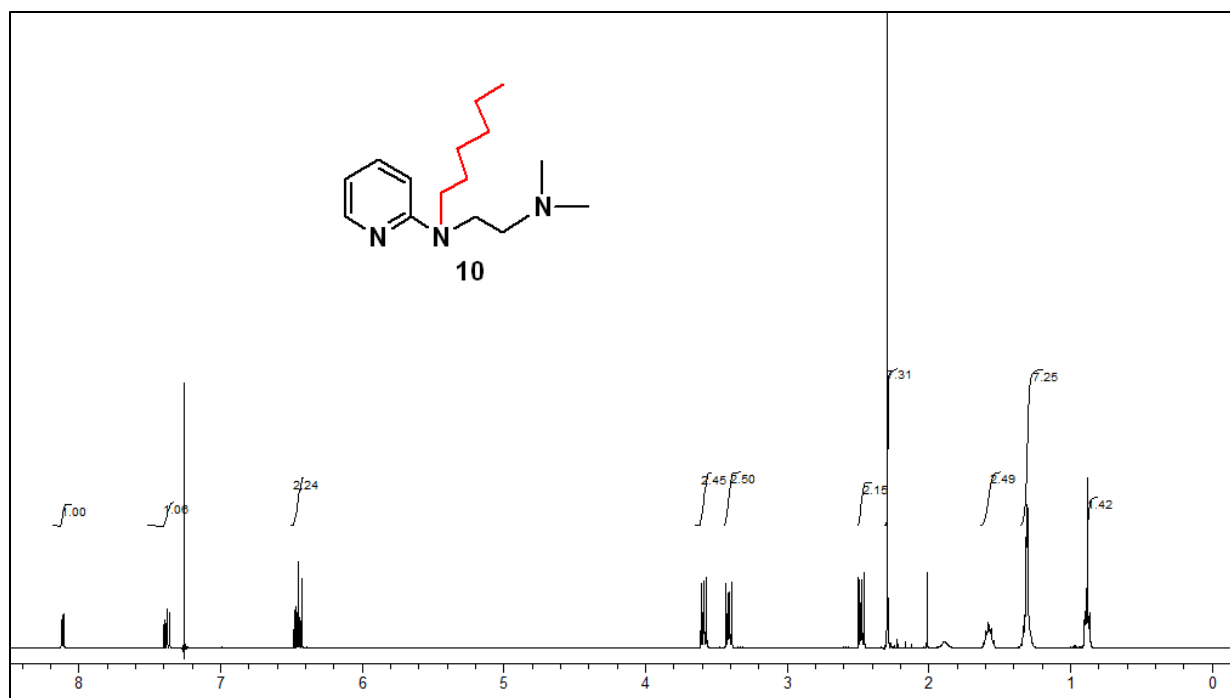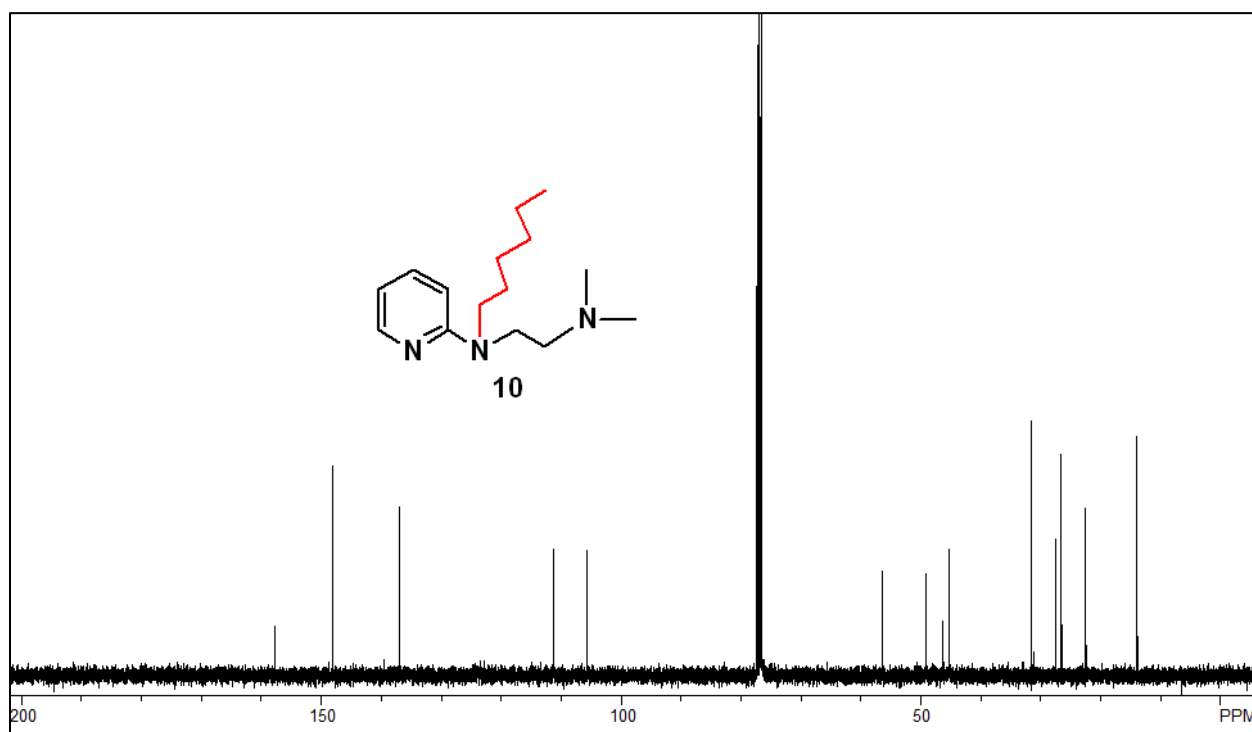

Figure S6

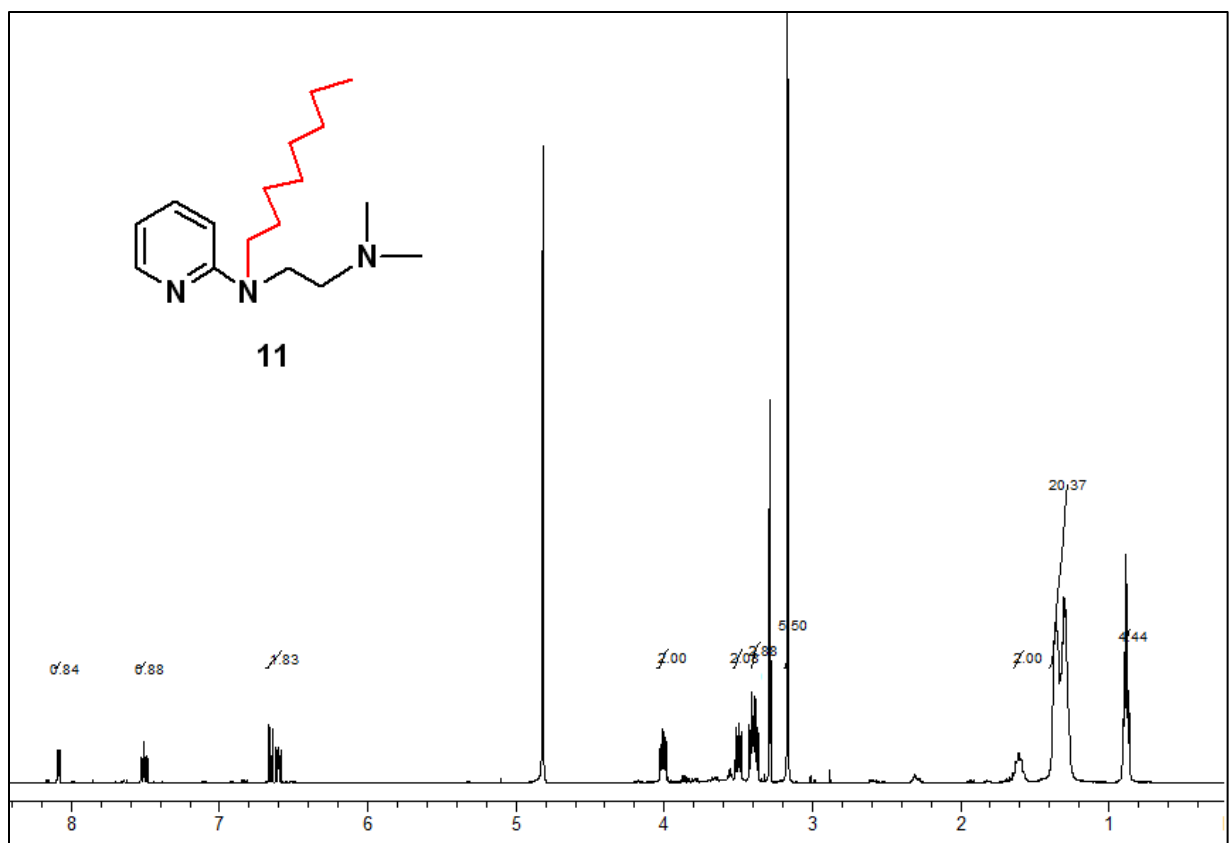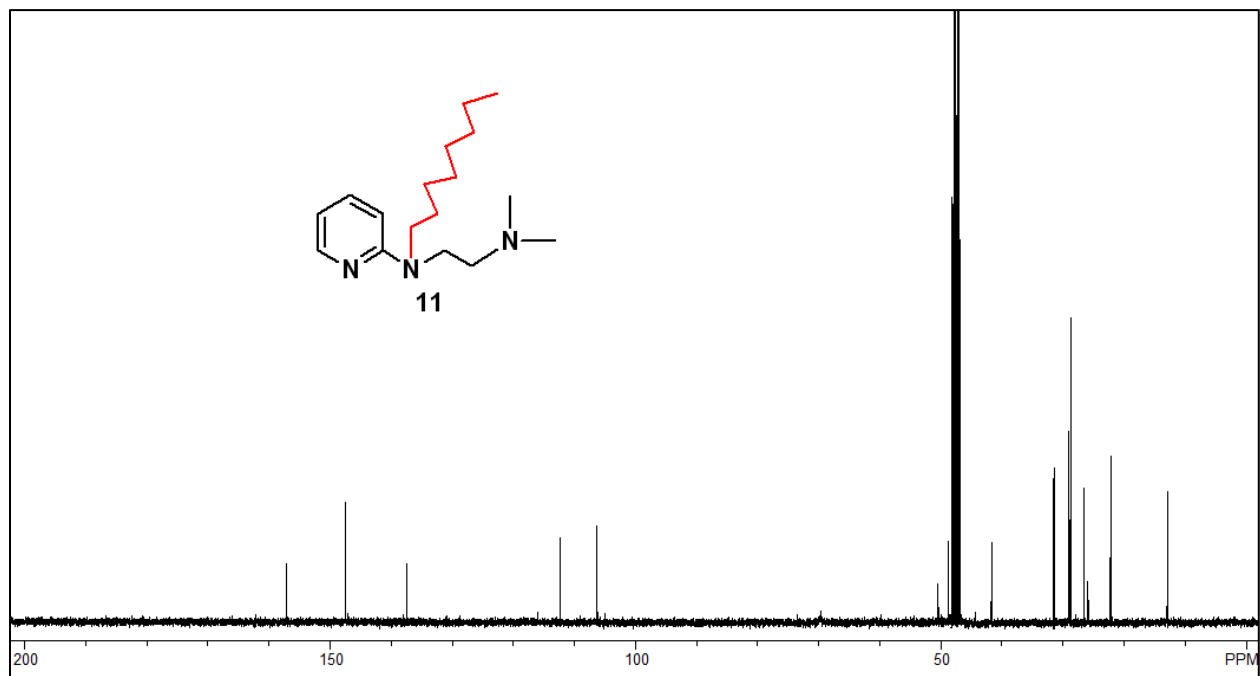

Figure S7



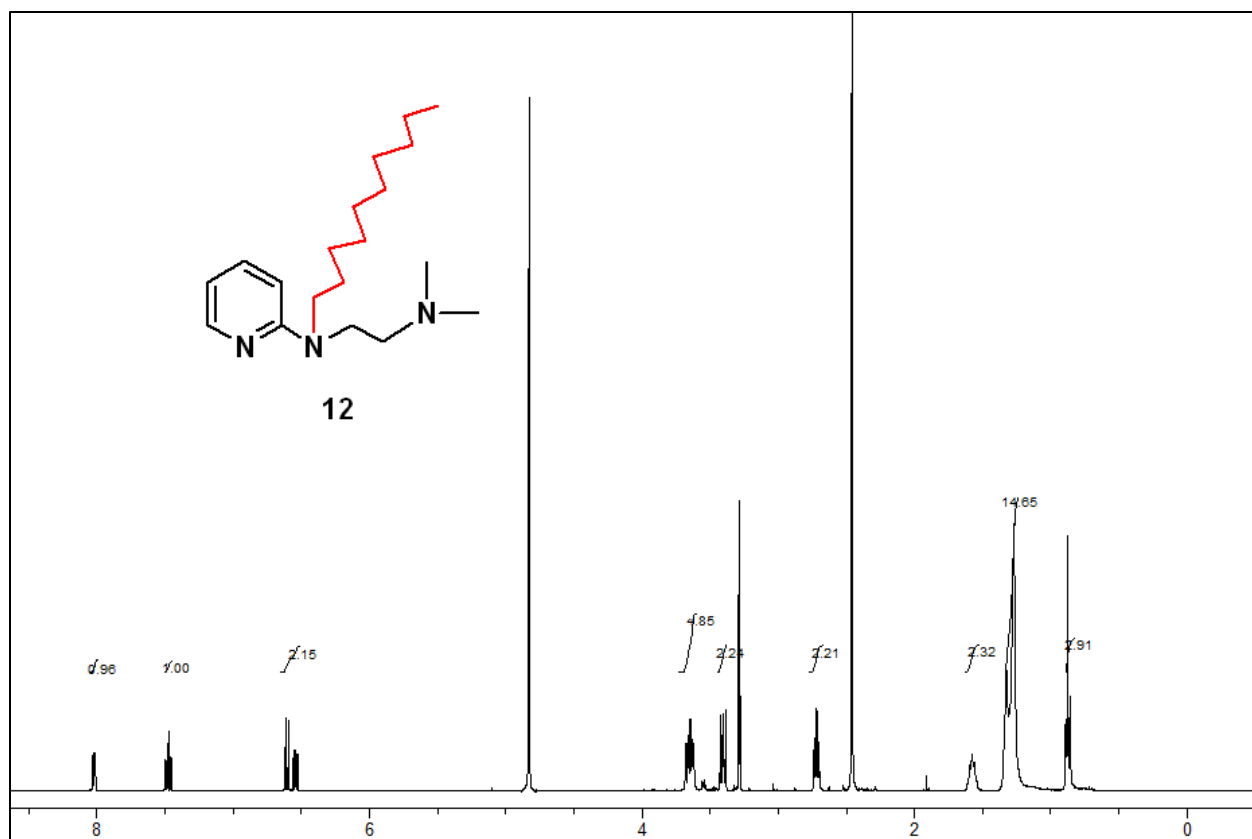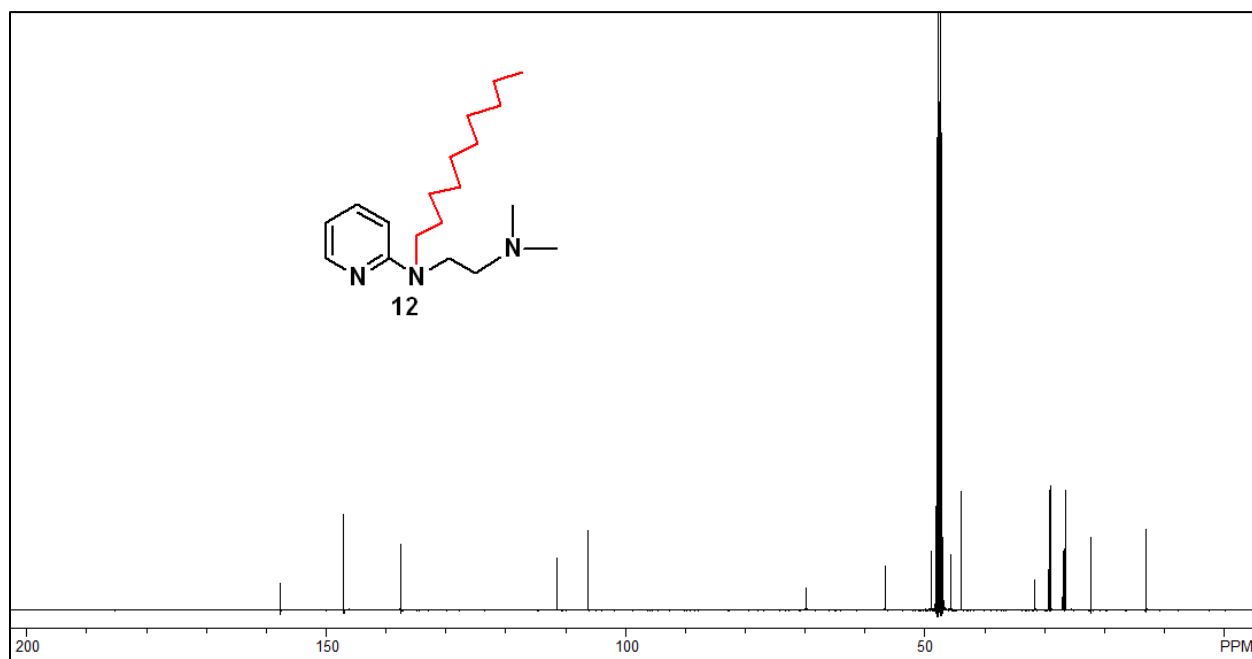

Figure S8

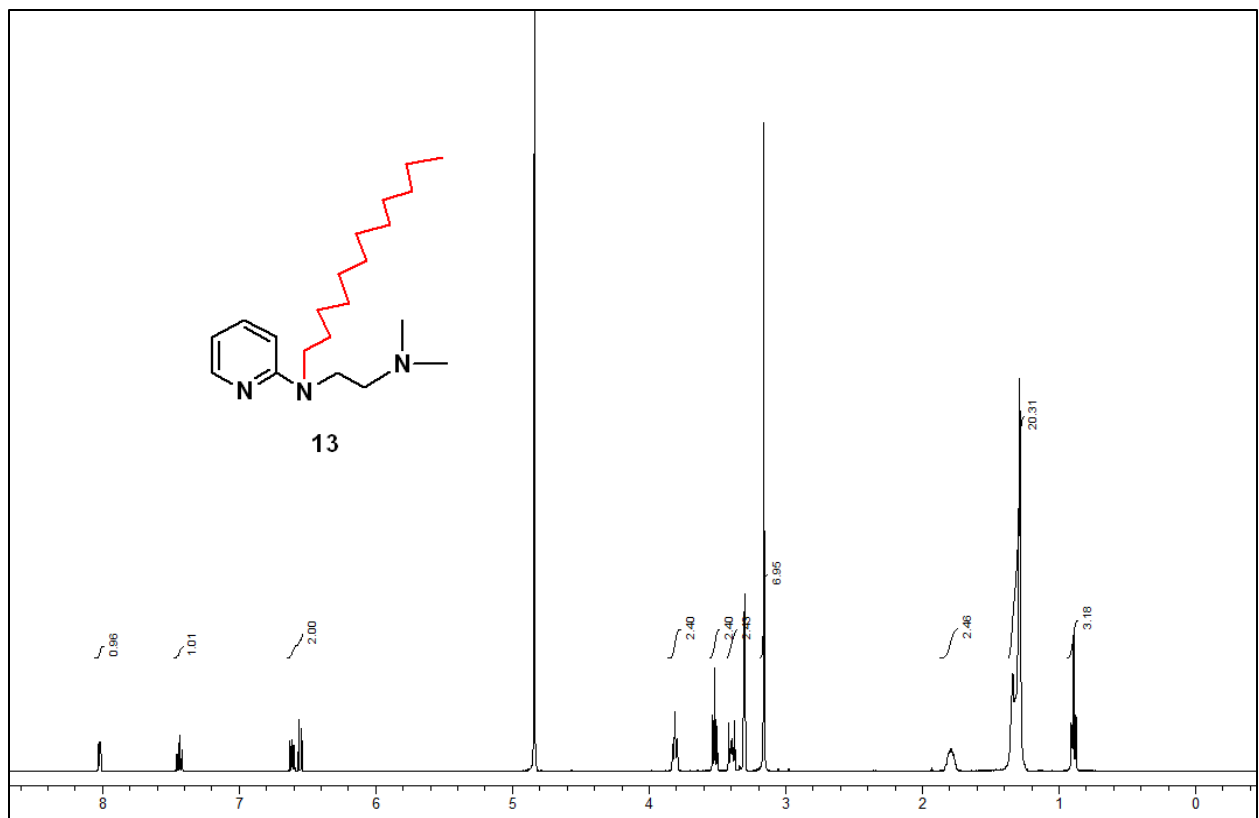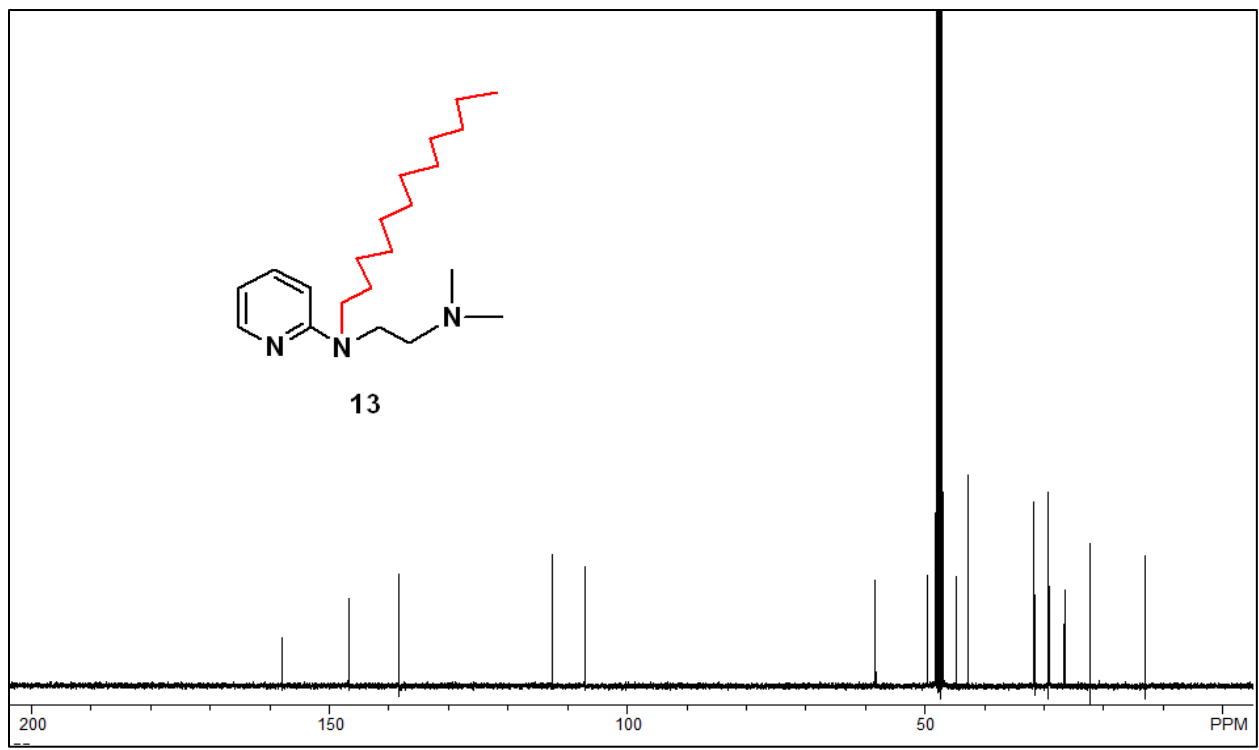

Figure S9

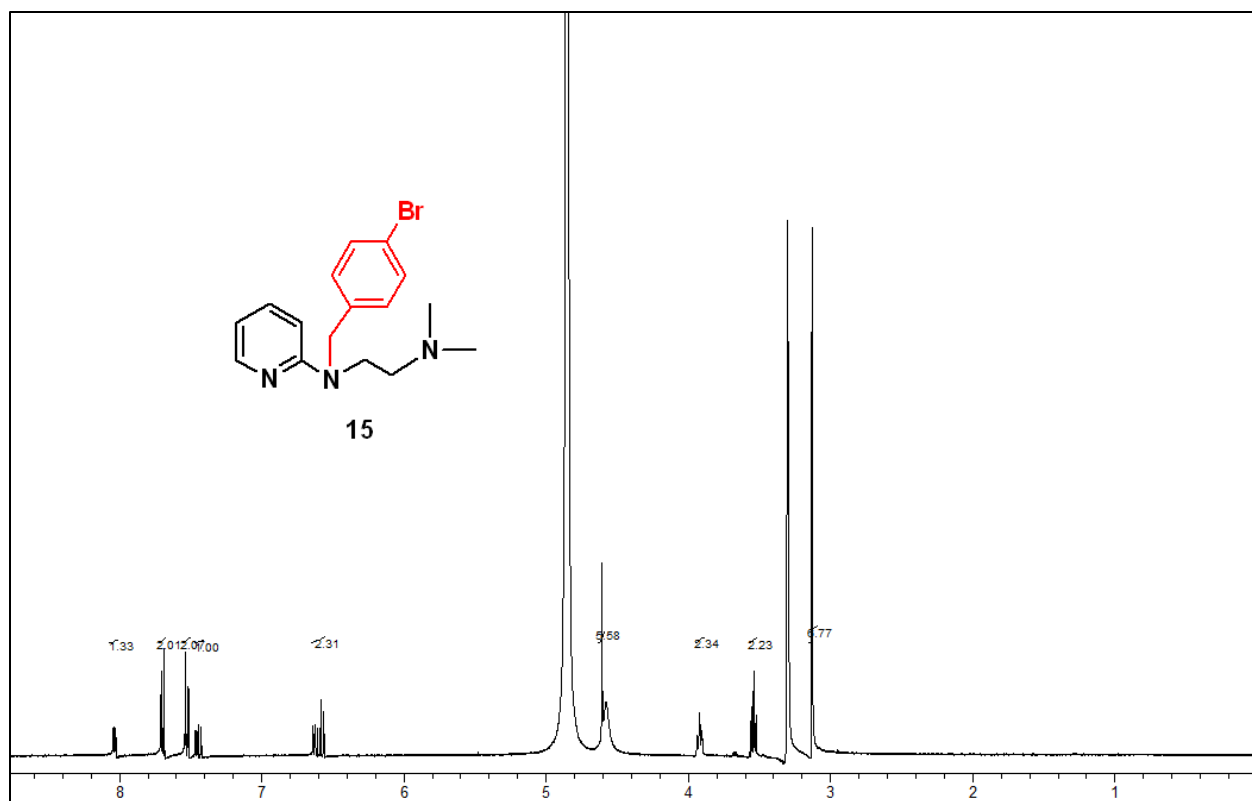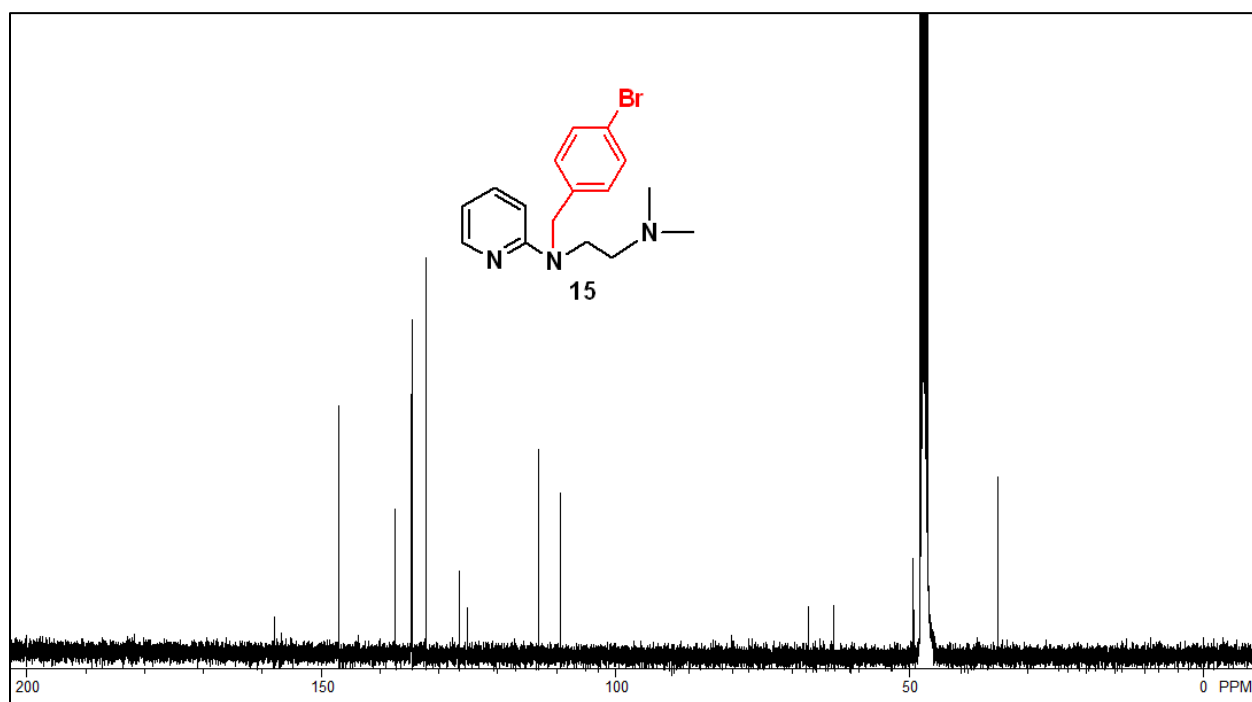

Figure S10

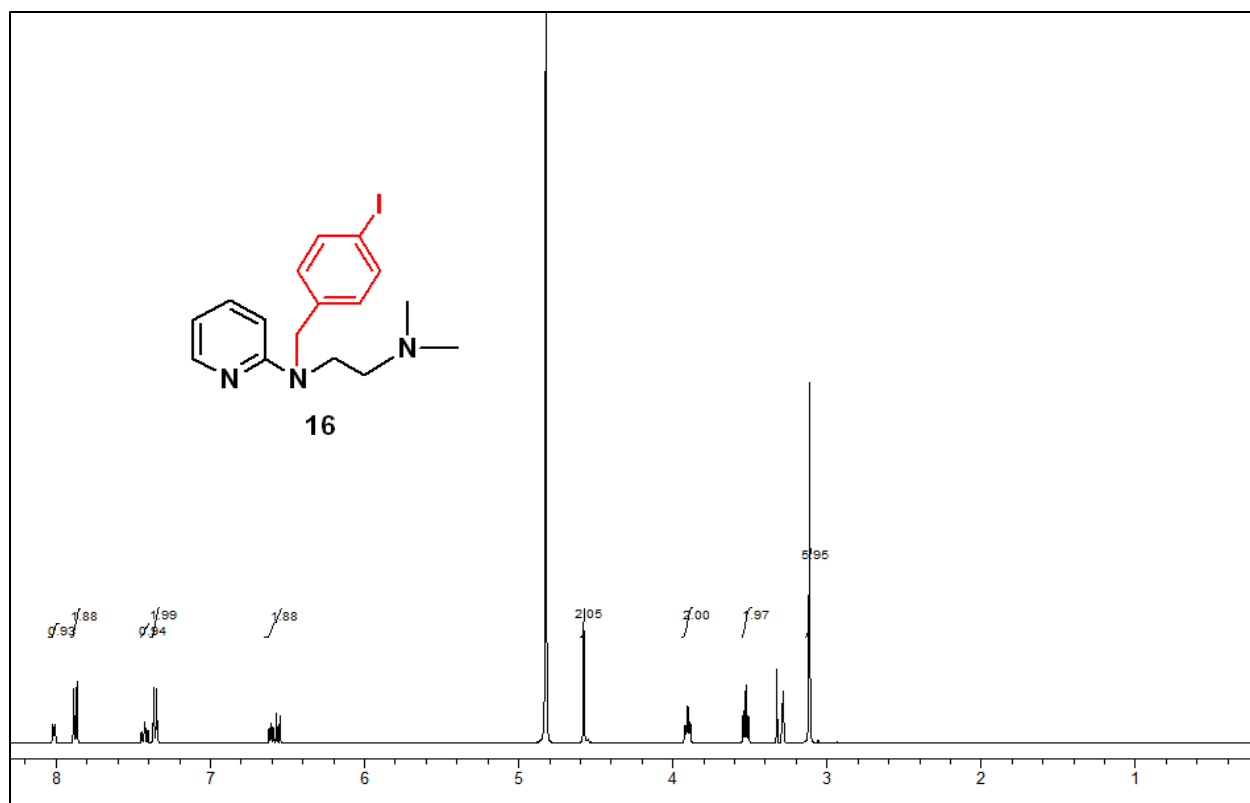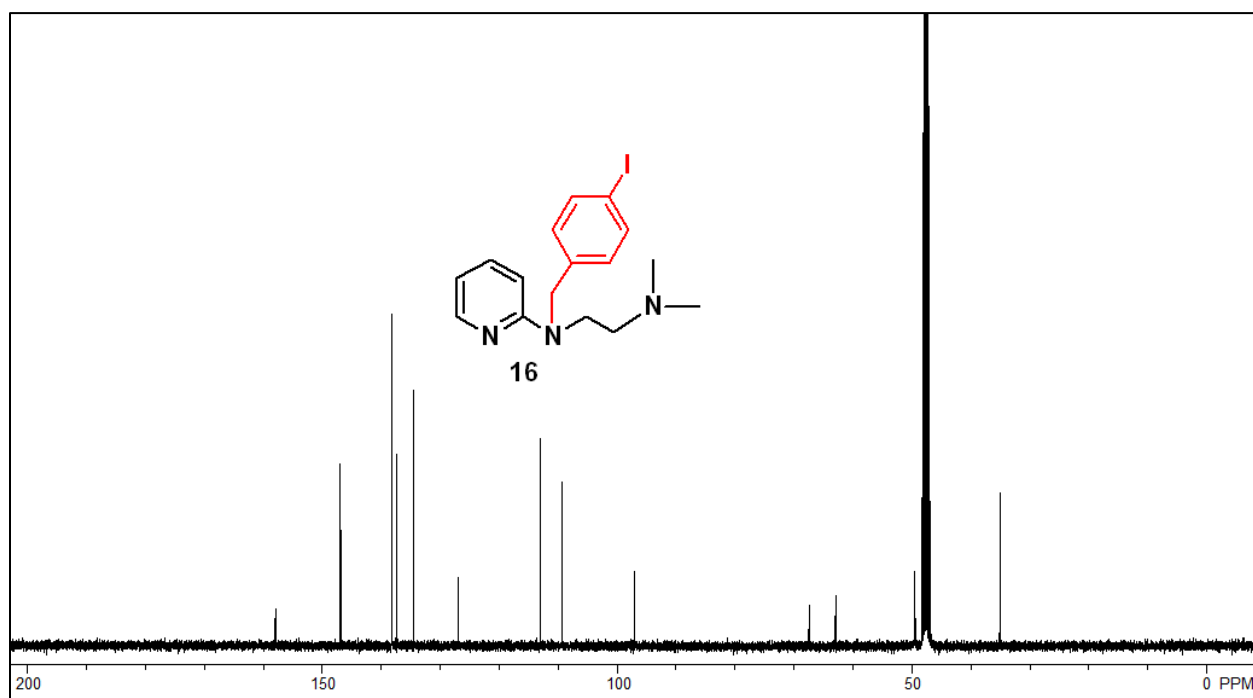

Figure S11

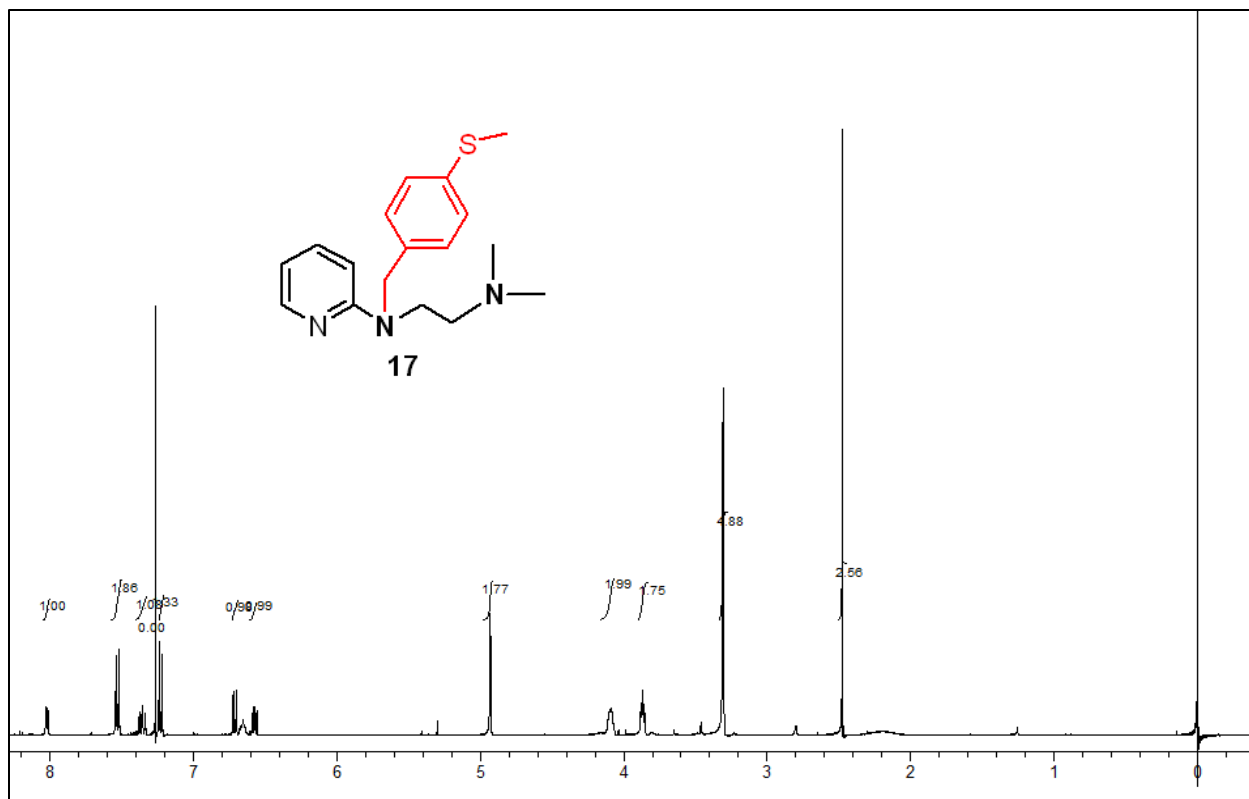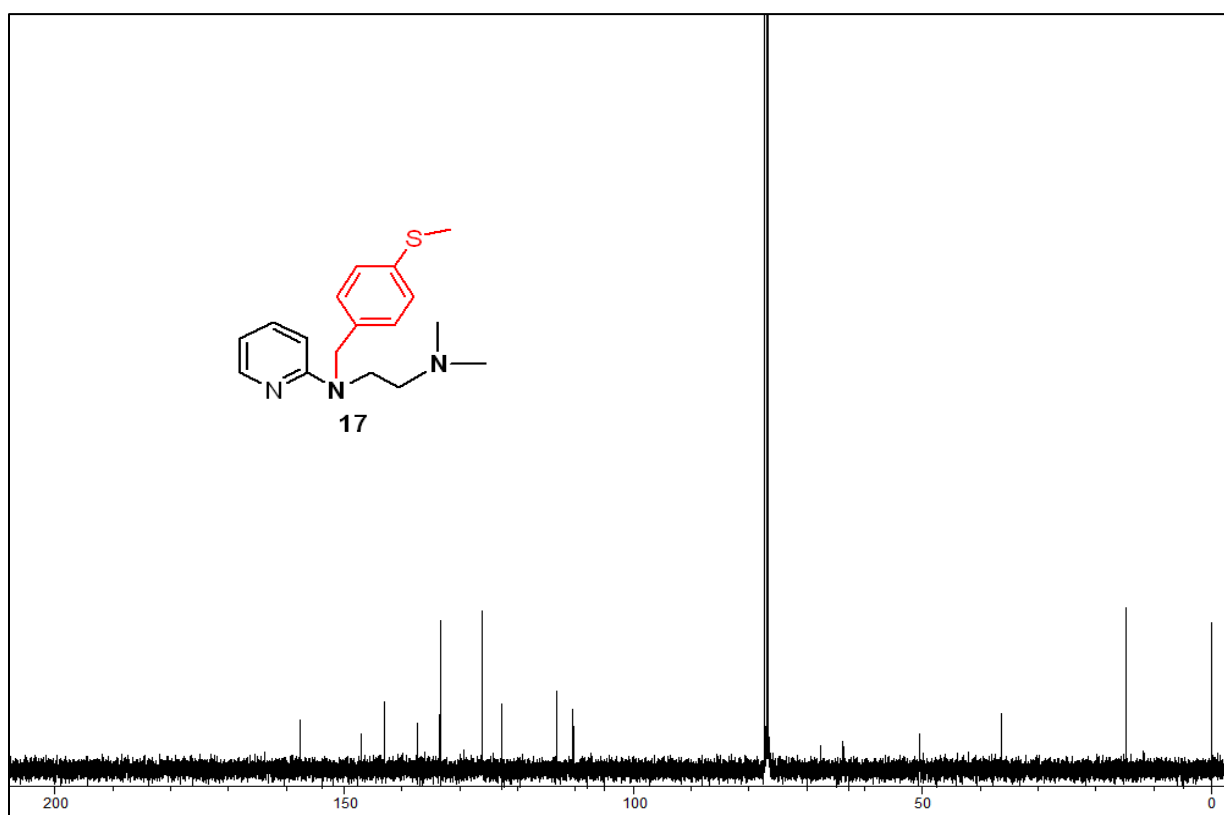

Figure S12

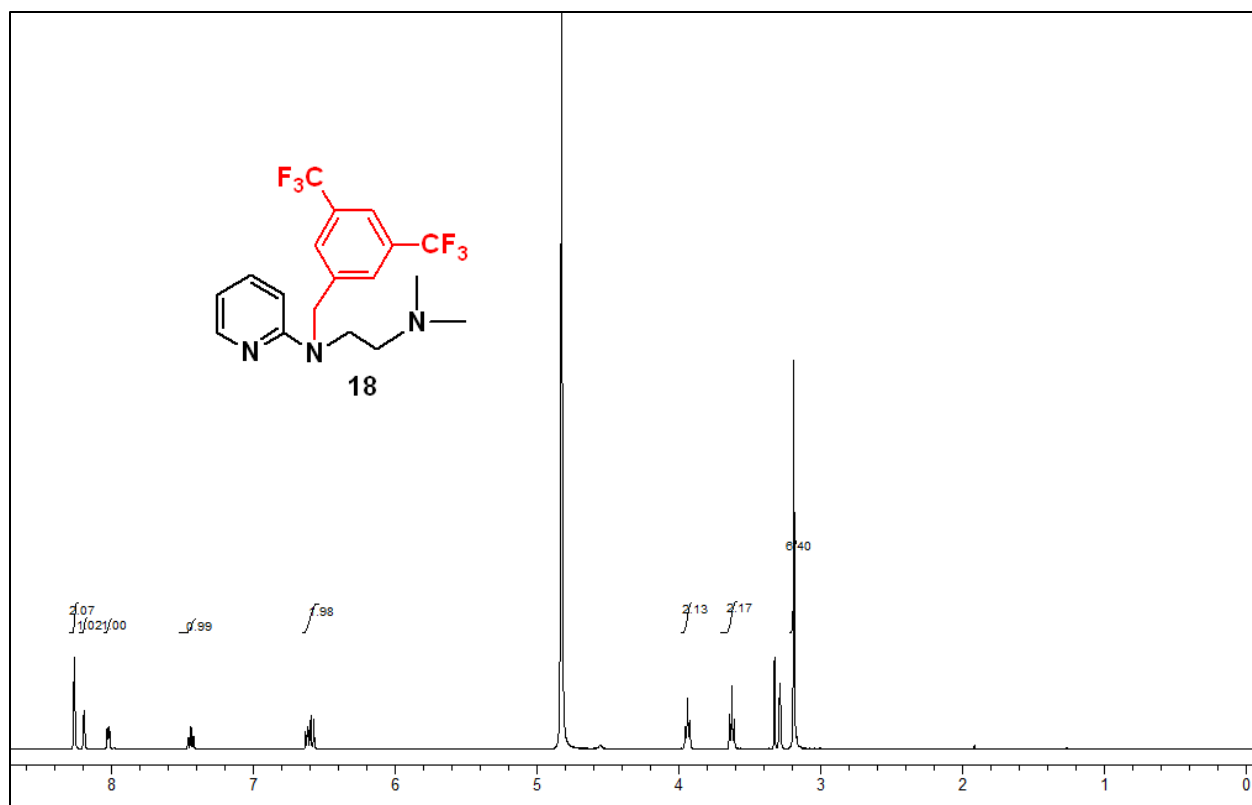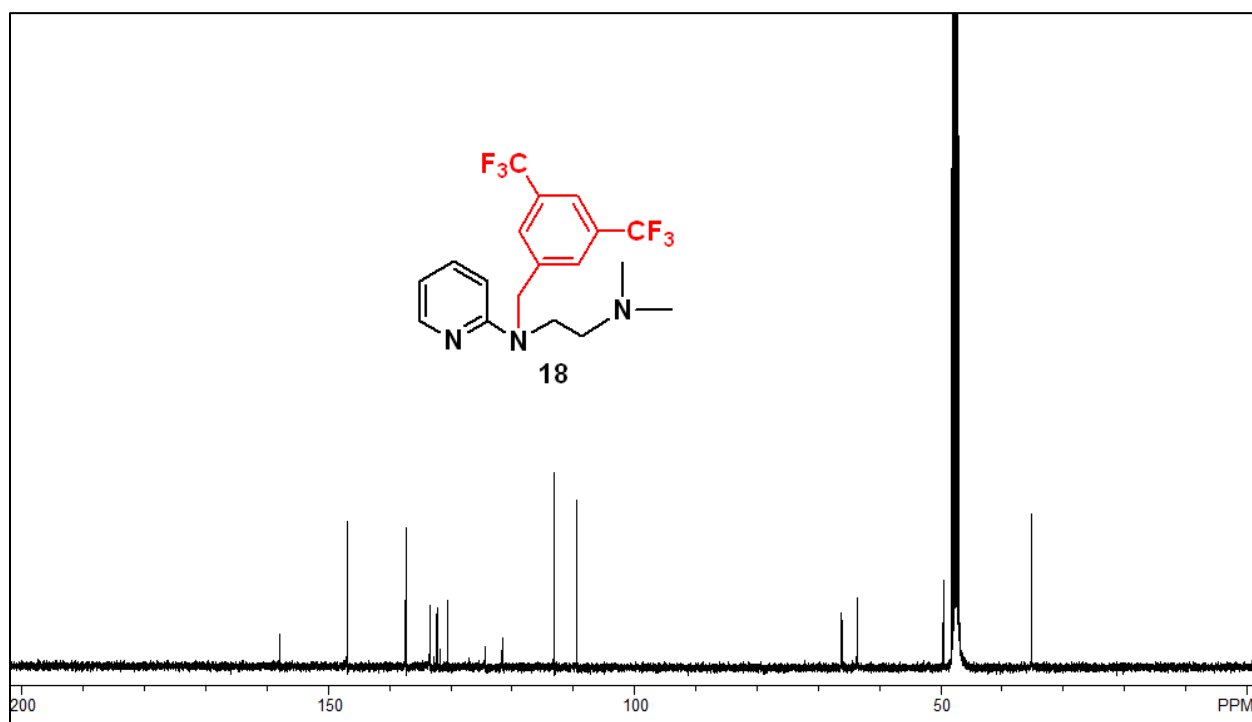

Figure S13

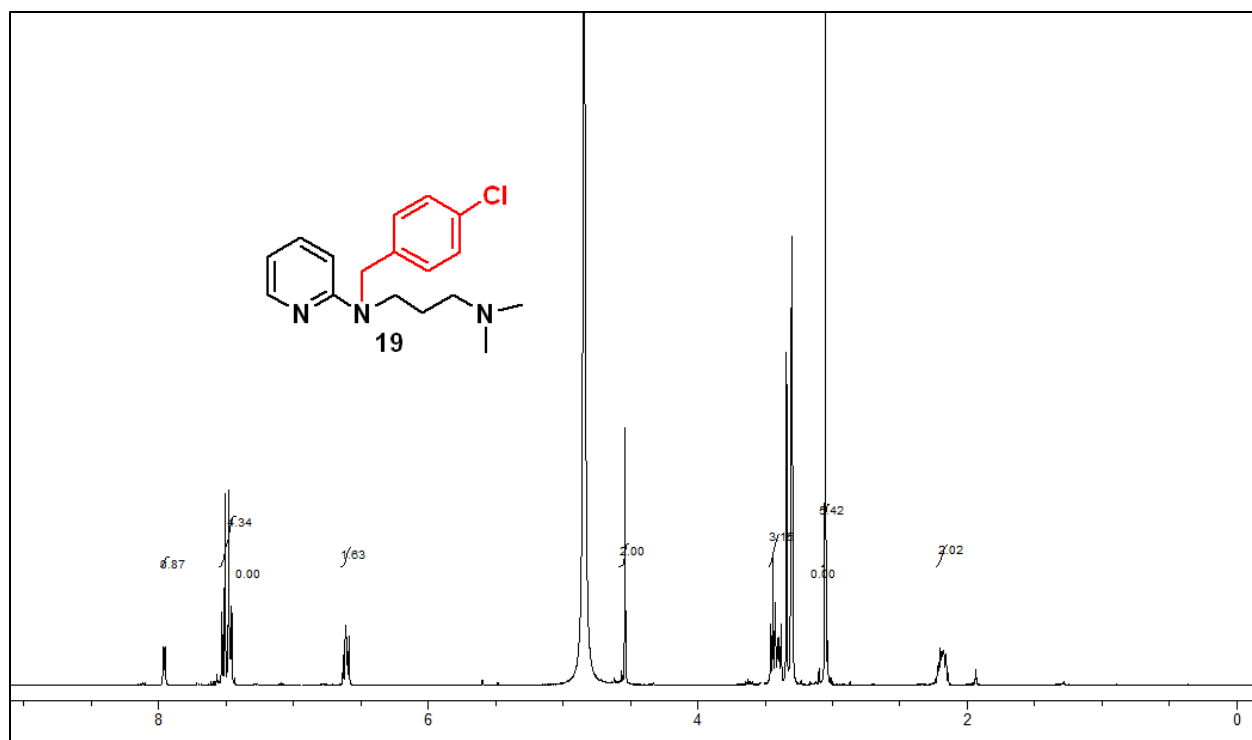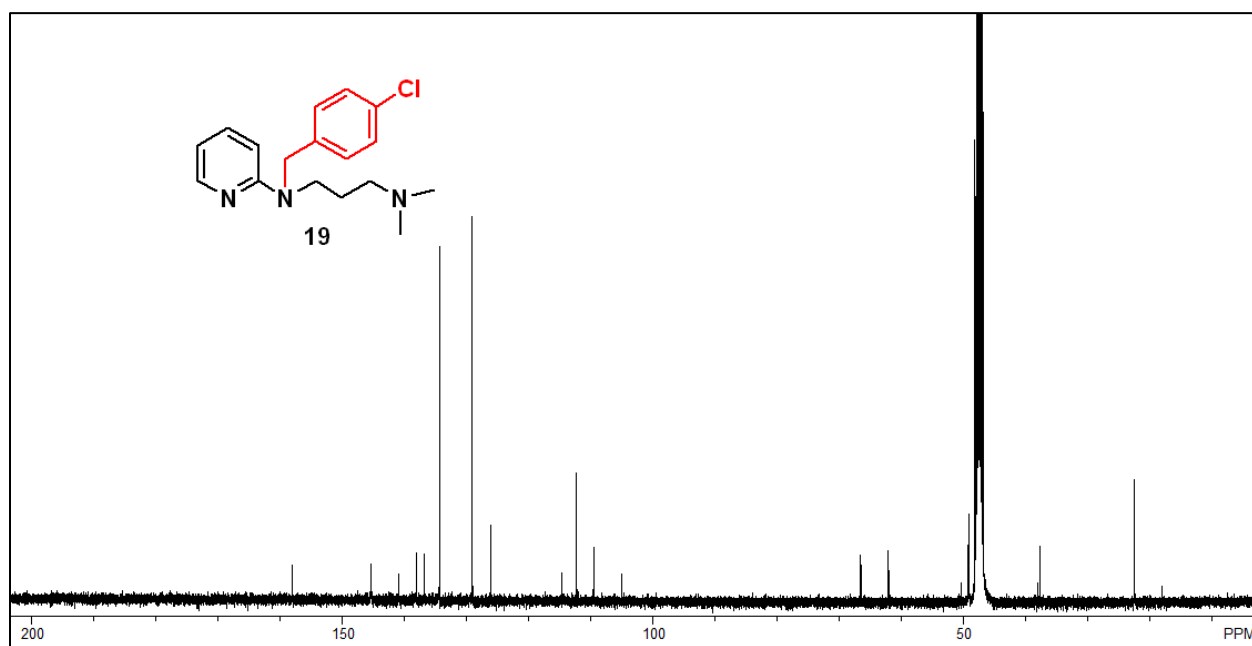

Figure S14

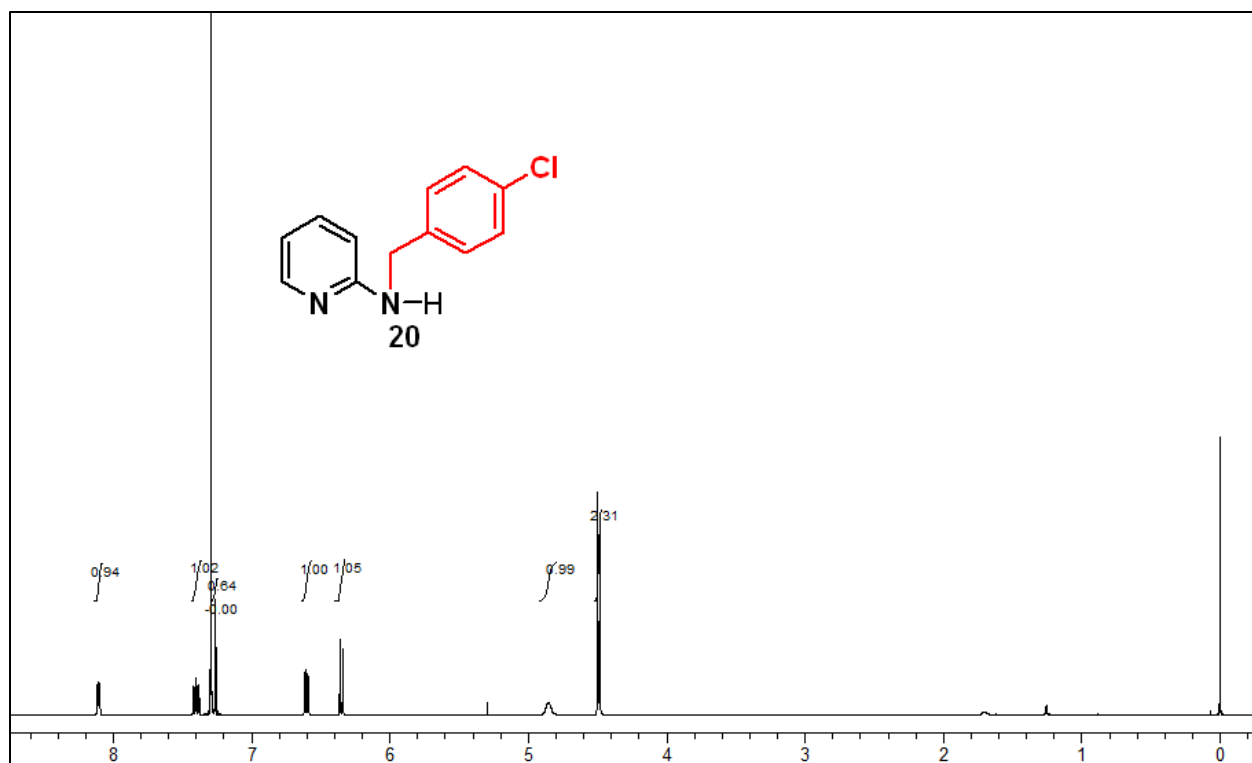

Figure S15



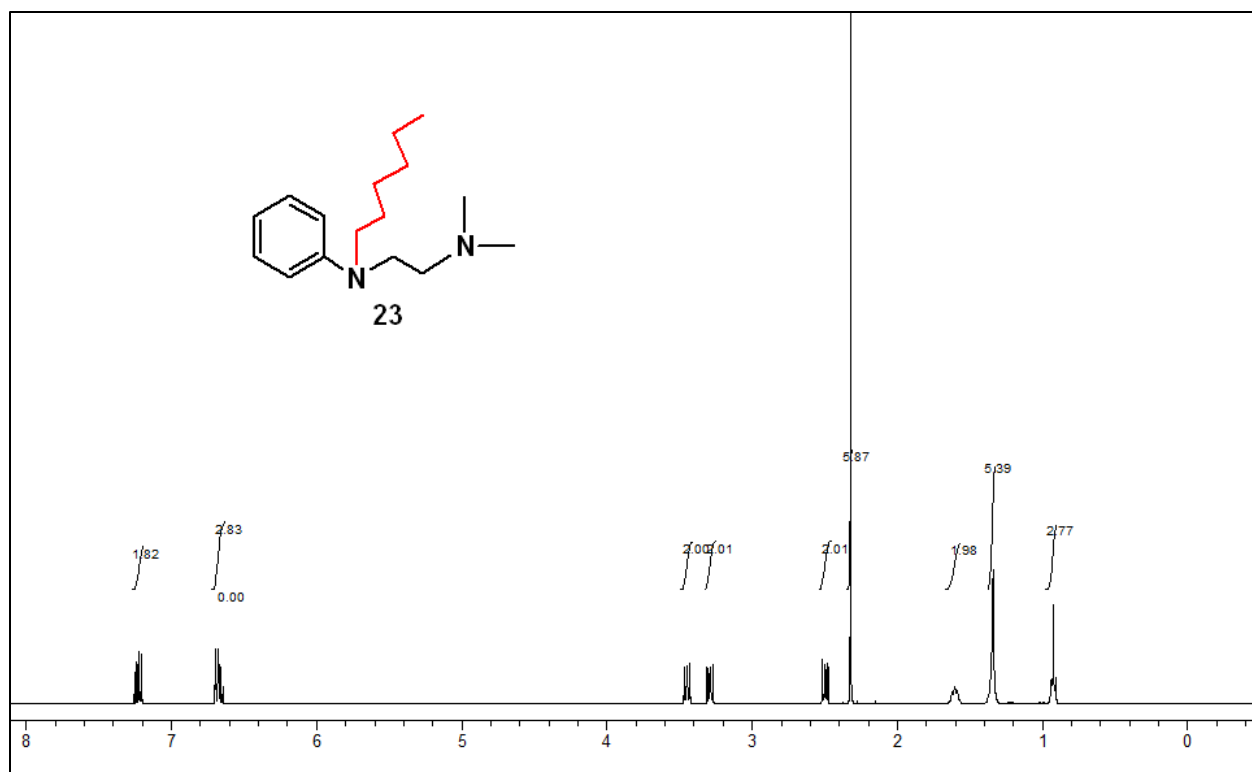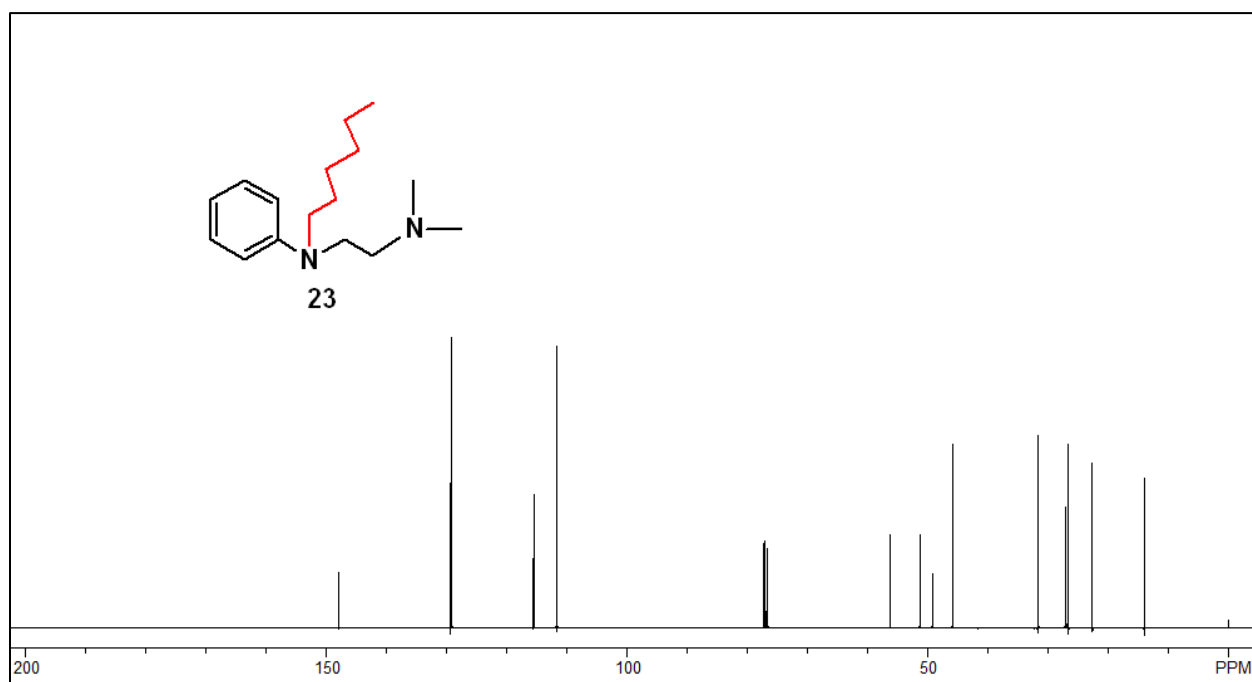

Figure S16

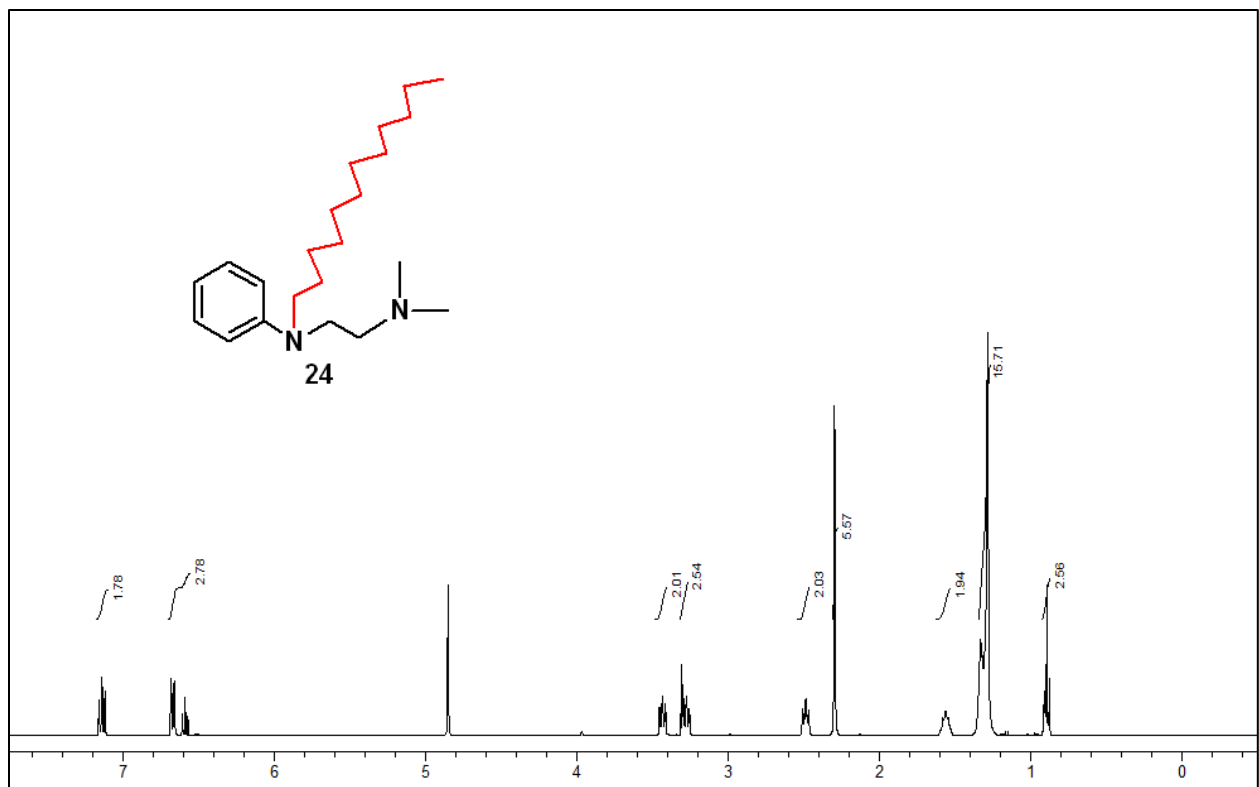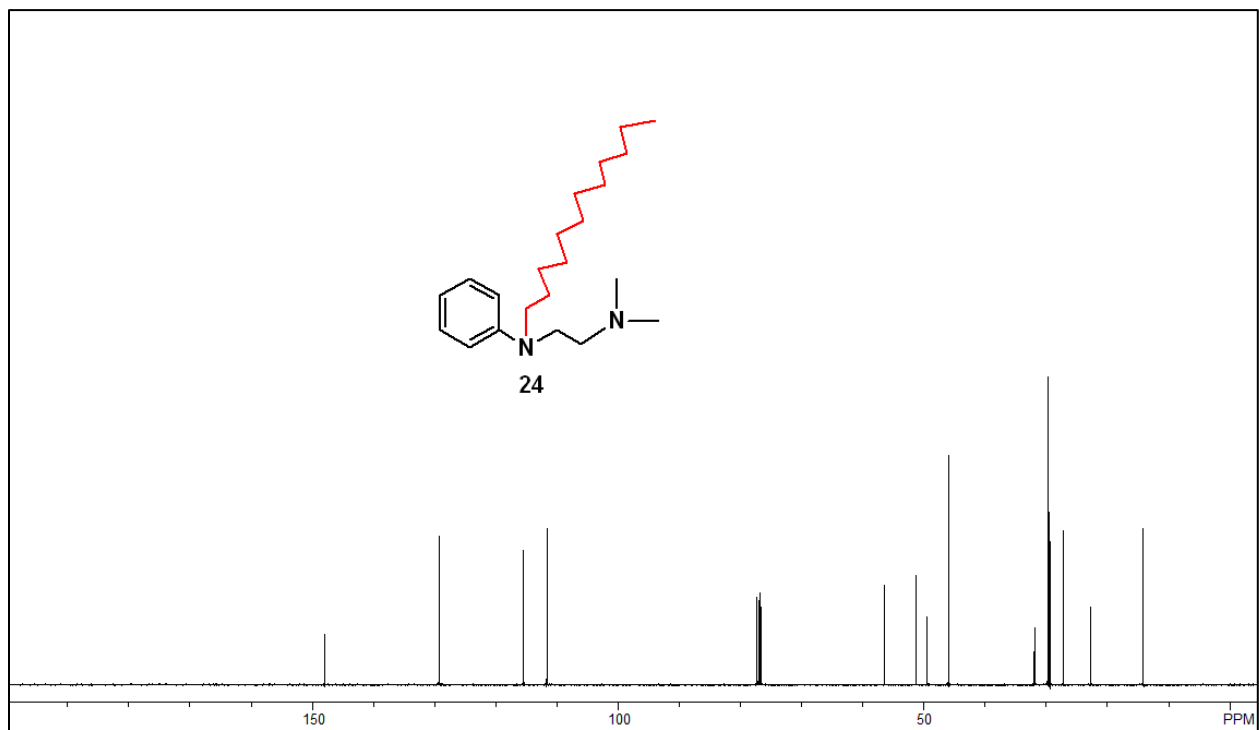

Figure S17

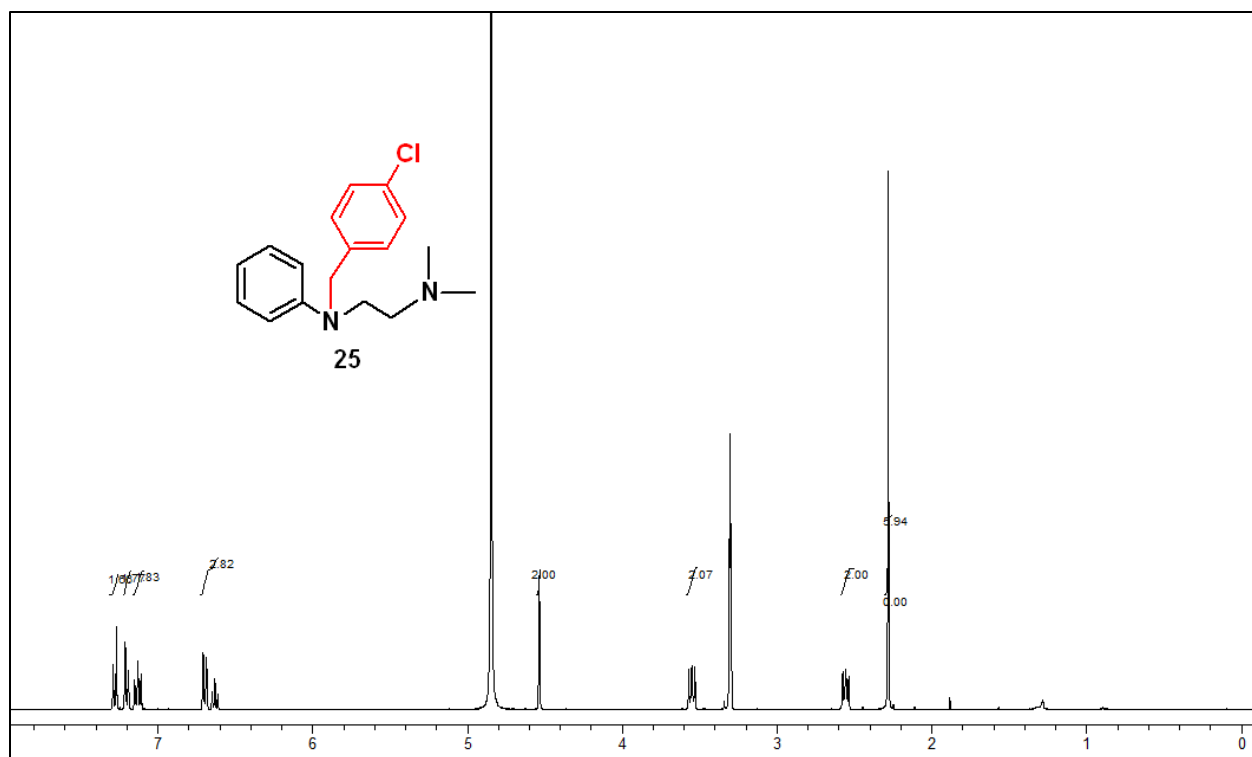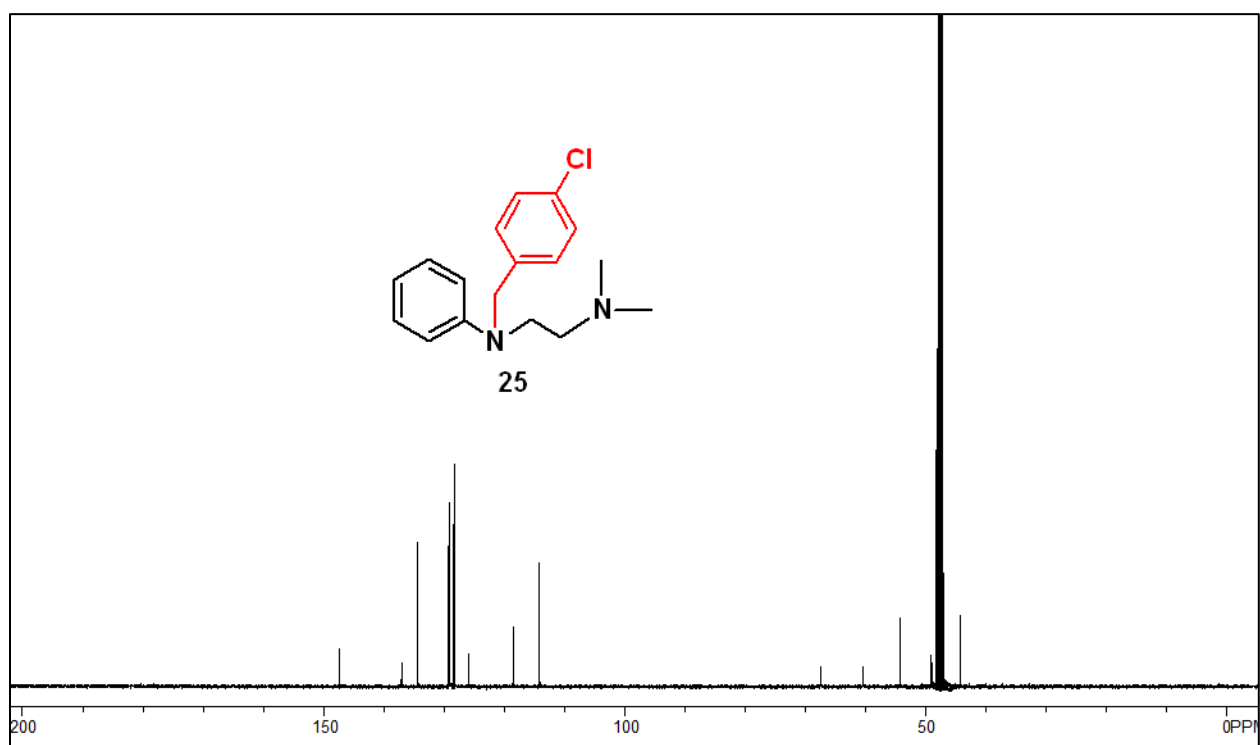

Figure S18

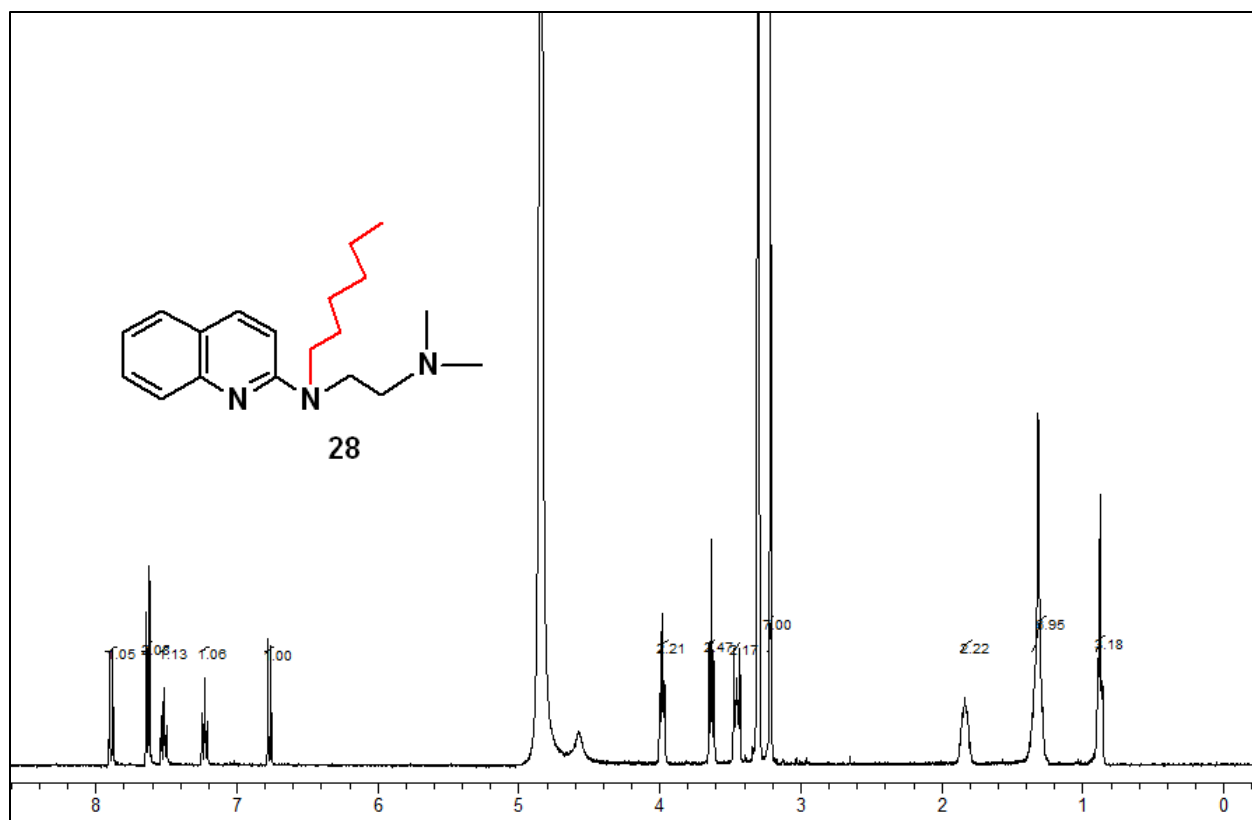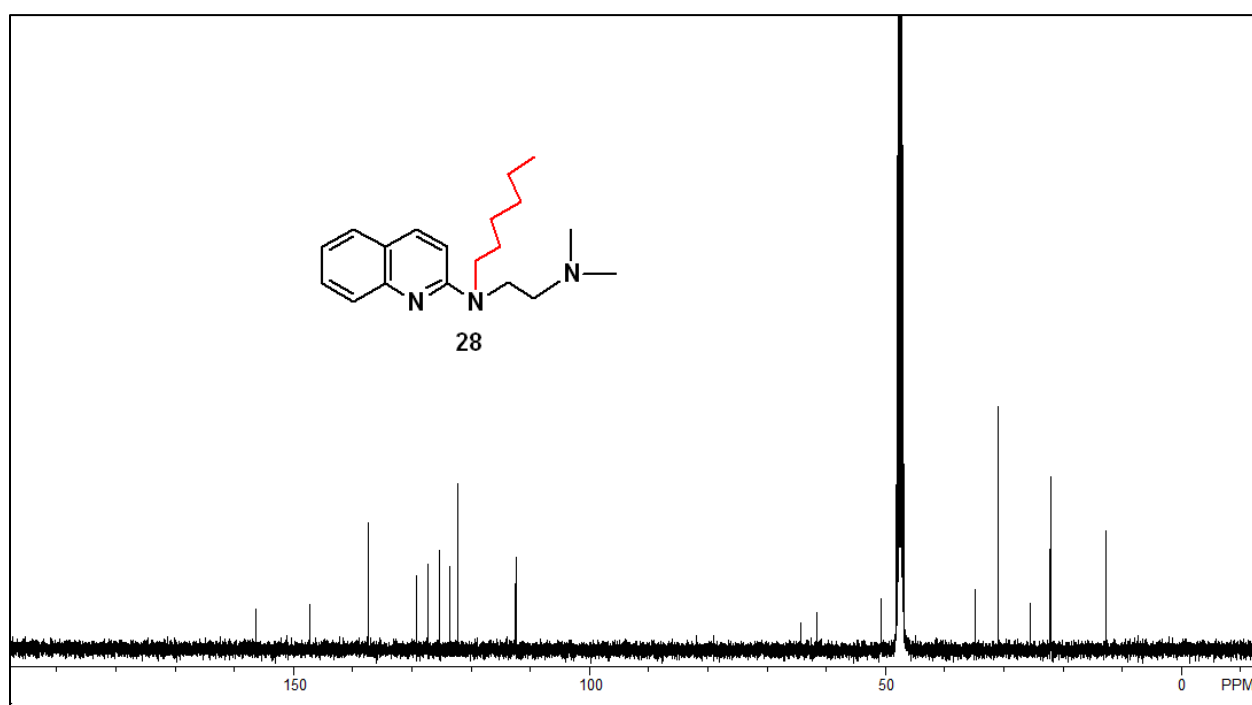

Figure S19

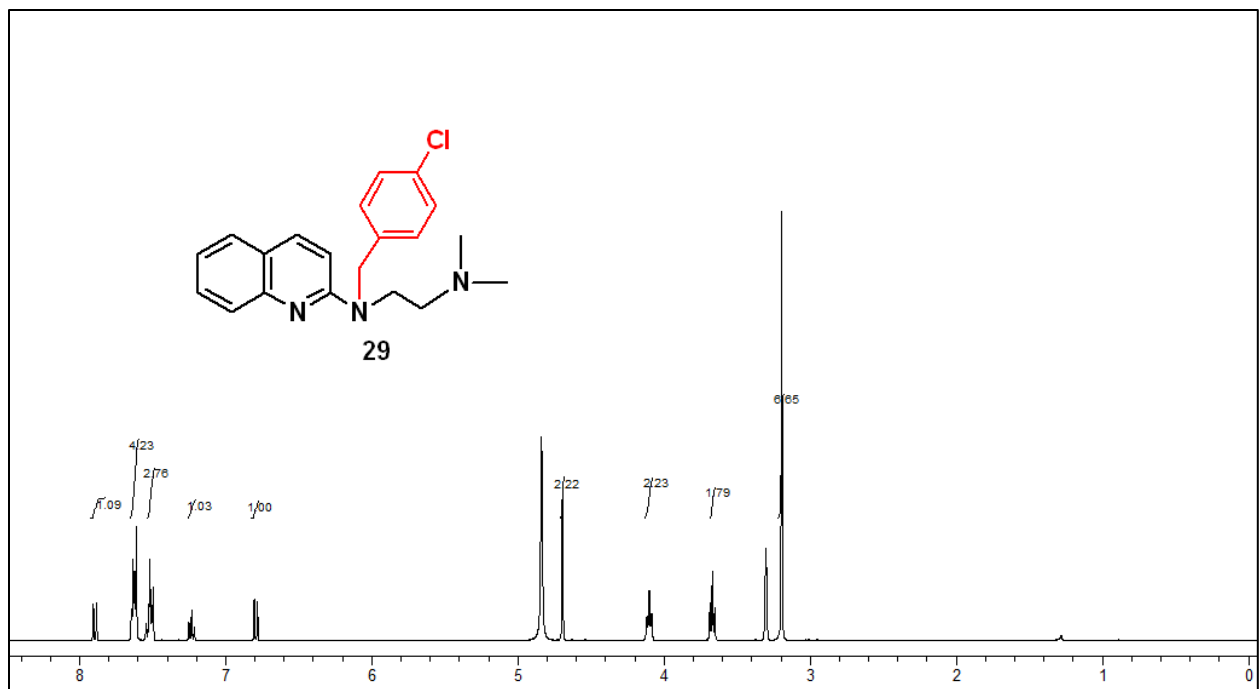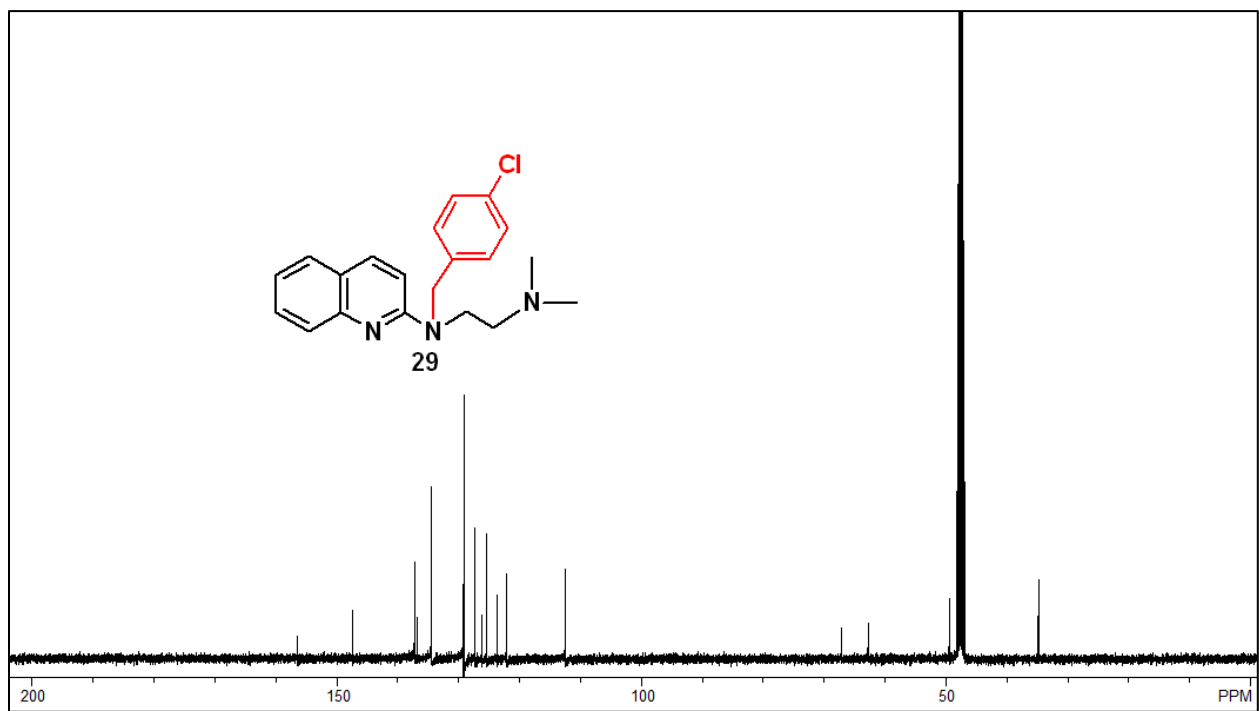

Figure S20

**Table S1.** Log P values of **1** analogs

| <b>Compound No.</b> | <b>Log P</b> |
|---------------------|--------------|
| 1                   | 1.721        |
| 7                   | -1.634       |
| 8                   | -2.053       |
| 9                   | 0.364        |
| 10                  | 1.295        |
| 11                  | 1.962        |
| 12                  | 2.723        |
| 13                  | 3.712        |
| 15                  | 1.771        |
| 16                  | 2.030        |
| 17                  | 1.792        |
| 18                  | 2.847        |
| 19                  | 1.650        |
| 20                  | 3.086        |
| 23                  | 1.563        |
| 24                  | 4.883        |
| 25                  | 2.087        |
| 27                  | 0.277        |
| 28                  | 2.653        |
| 29                  | 2.704        |

<sup>a</sup>Log P values were calculated using PALLUS software.

**Figure S21.** Predicted binding pose of compound **27** to the FAT domain of FAK.

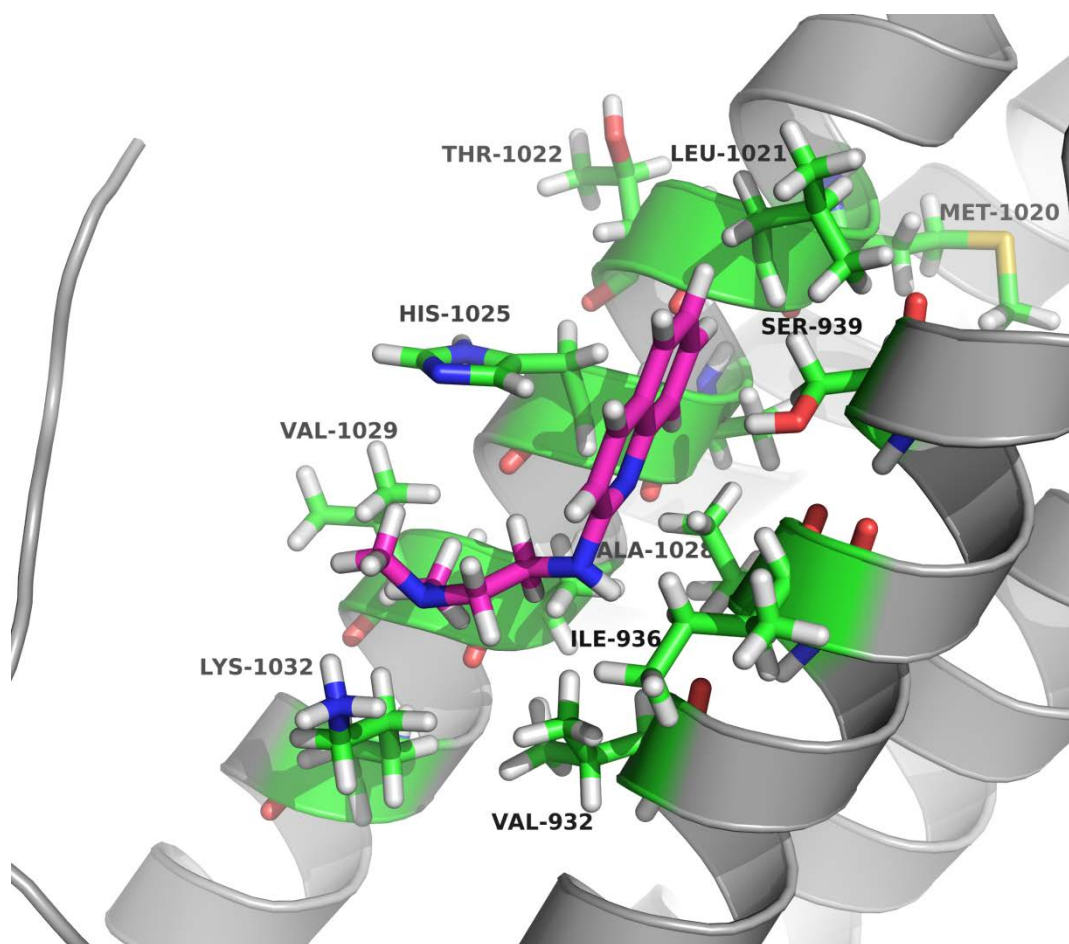

Ribbon representation of the FAT domain (gray) showing the binding pose of analog **27** (magenta stick) and residues within 5 Angstroms of **27** (green stick).

**Figure S22.** Predicted binding pose of compound **28** to the FAT domain of FAK.

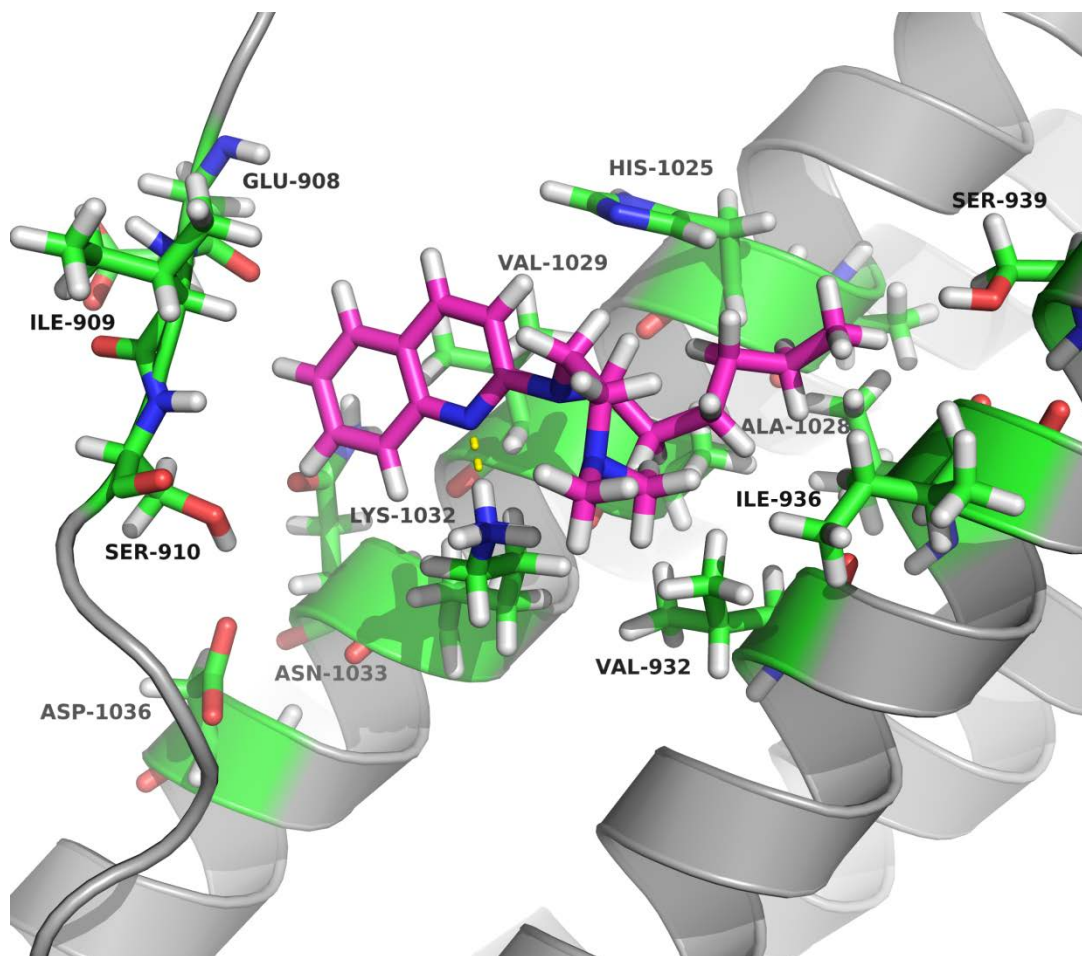

Ribbon representation of the FAT domain (gray) showing the binding pose of analog **28** (magenta stick) and residues within 5 Angstroms of **28** (green stick). A hydrogen bond (yellow dashed line) is formed between the quinoline ring of **28** and Lys 1032.
